# Supplementary material for: Underestimated Risk of Glacial Lake Outburst Floods in the Himalayas
Source: Research Square preprint supplement (doi:10.21203/rs.3.rs-6372593/v1), 2025-04-09
Supplement: Supplementary file 1 [file 8ae8ff0dd1dcfbaf71862f7f.docx]

Supplementary Materials

**Underestimated Risk of Glacial Lake Outburst Floods in the Himalayas**

Weigui Guan2,3, Fang Chen1,2,3,*, Meimei Zhang1,2,3,*,

1 International Research Center of Big Data for Sustainable Development Goals. Beijing 100094, China

2 Key Laboratory of Digital Earth Science, Aerospace Information Research Institute, Chinese Academy of Sciences, Beijing 100094, China

3 University of Chinese Academy of Sciences, Beijing 100049, China

✉e-mail: <chenfang@radi.ac.cn>, <zhangmm@radi.ac.cn>

**This file includes:**

Supplementary Figures 1 to 13

Supplementary Tables 1 to 6

Supplementary References


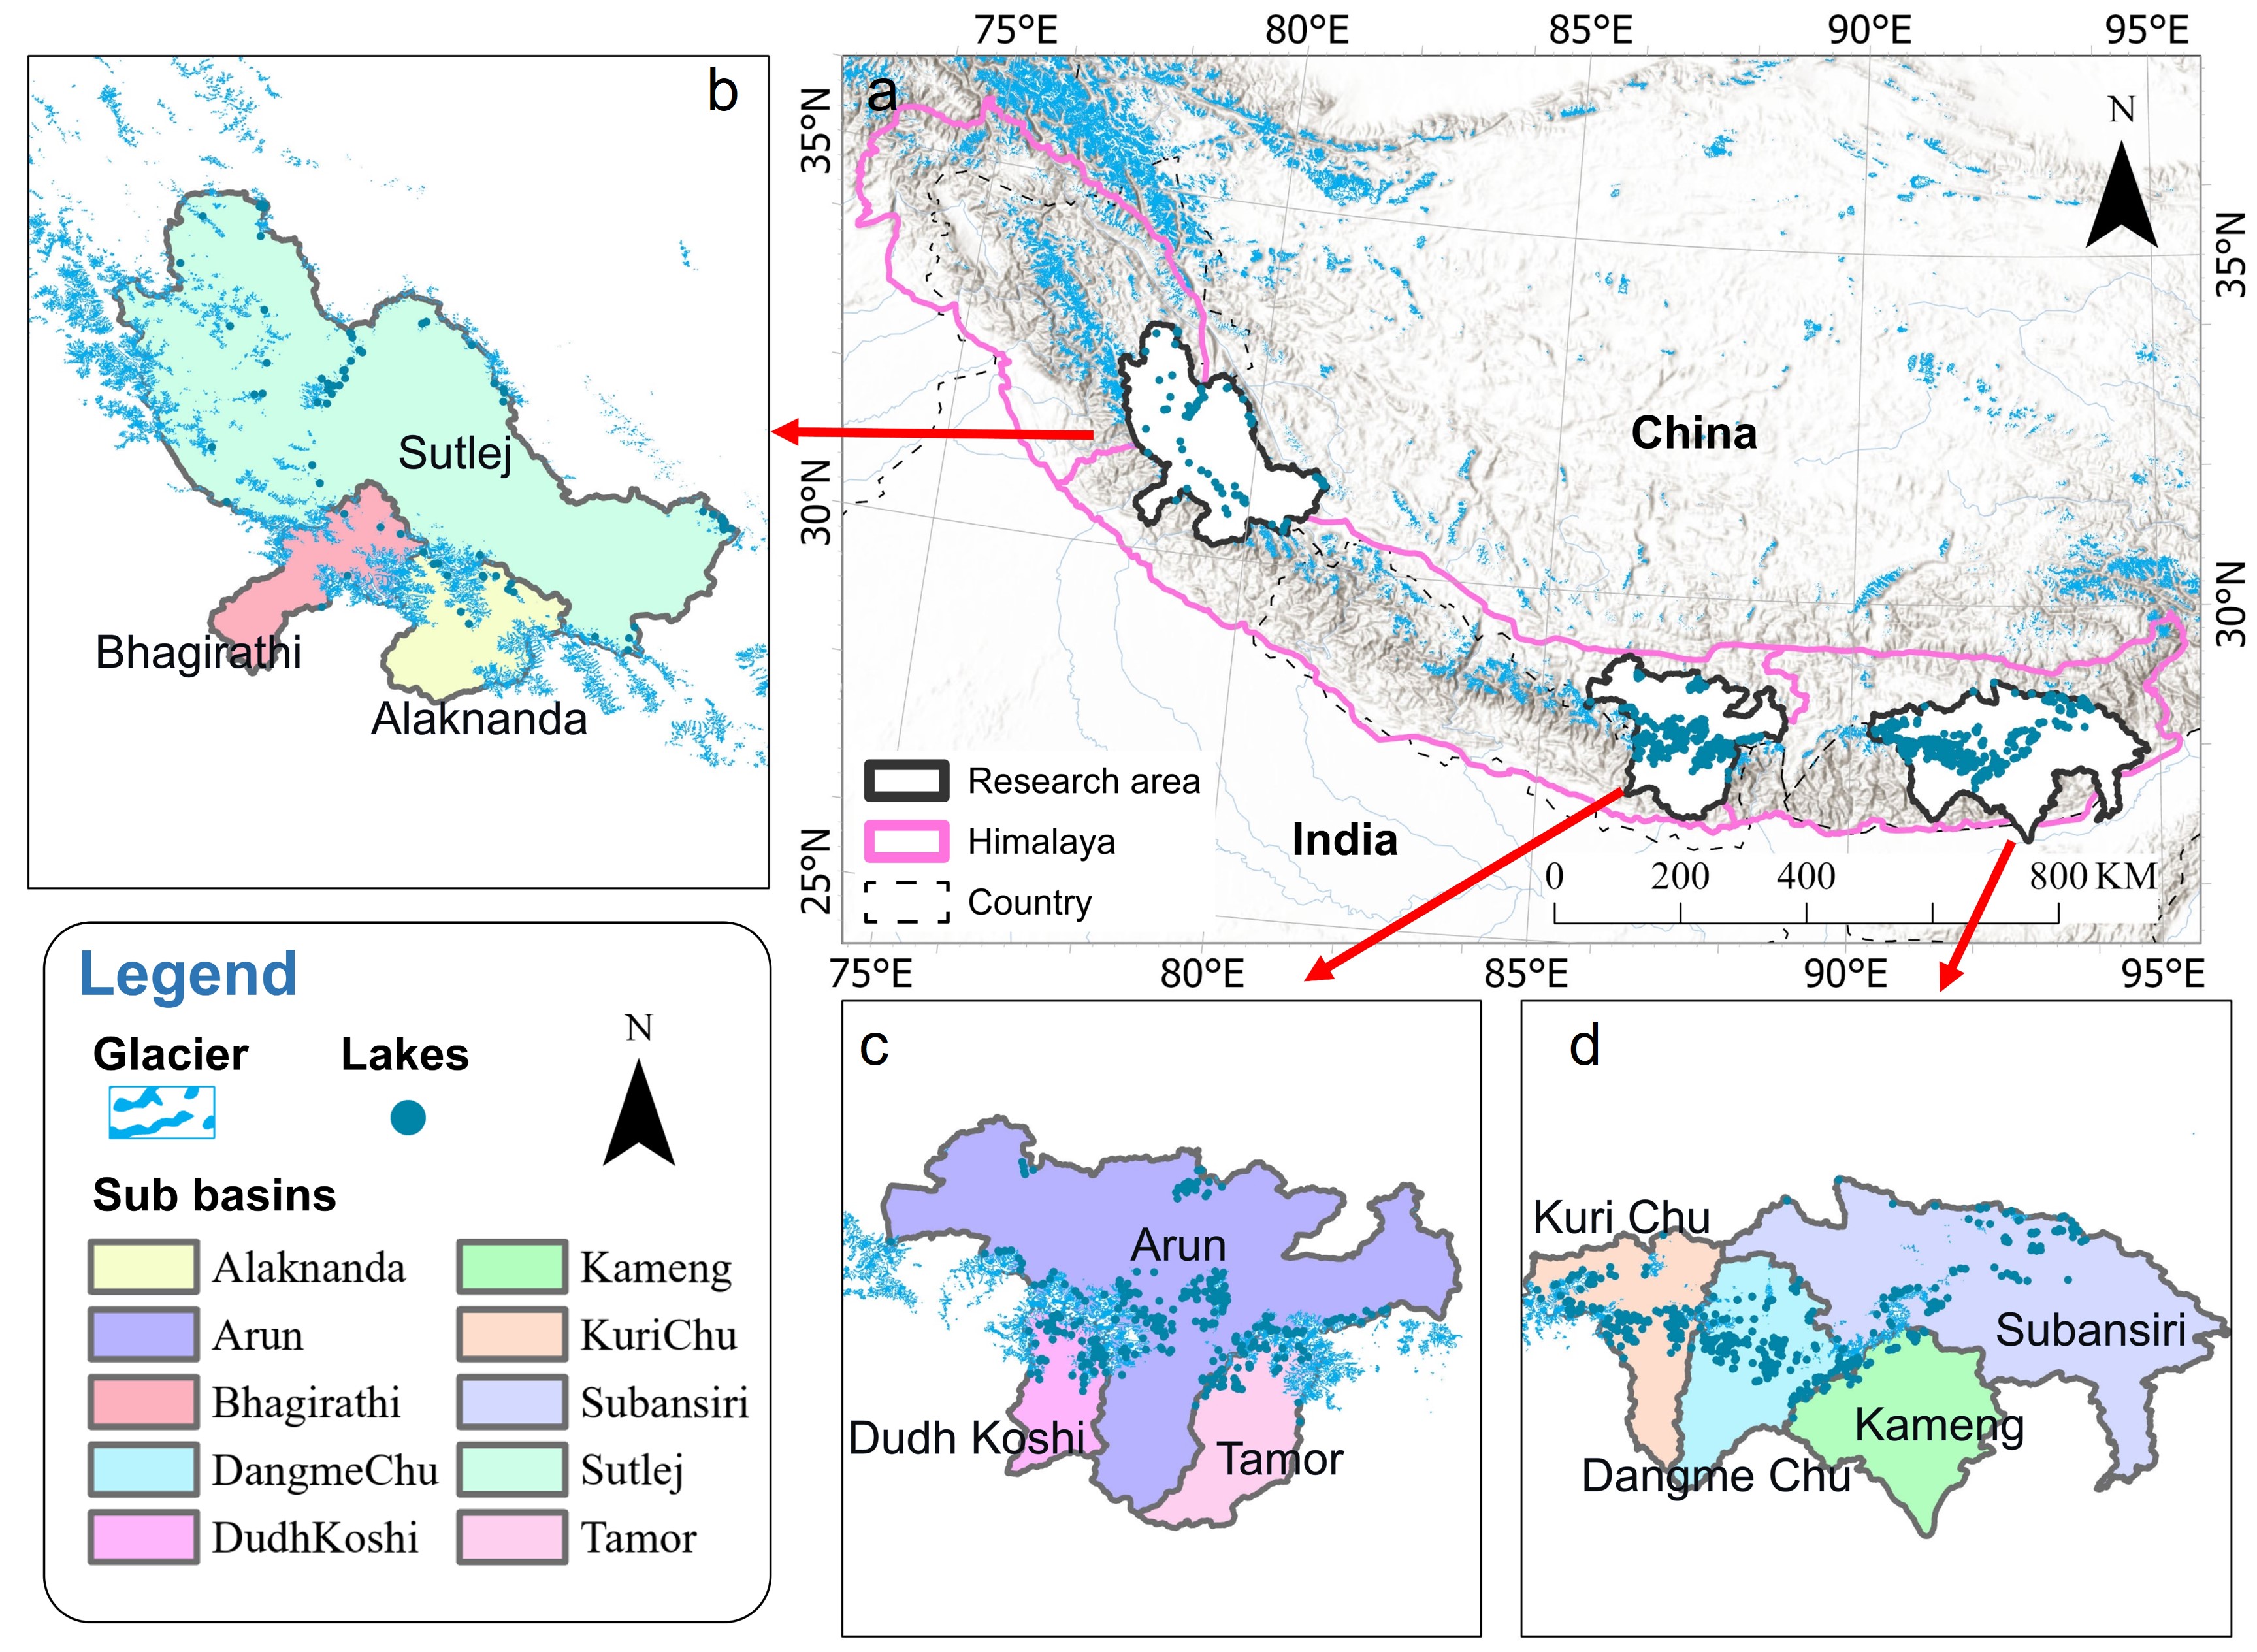


**Supplementary Figure 1 | Location and distribution of glacial lakes in the ten sub-basins of Himalaya. a** Overview map, including the boundaries of the study area and surrounding countries. **b** Sutlej, Bhagirathi, Alaknanda. **c** Arun, Dudh Koshi, Tamor. **d** Kuri Chu, Dangme Chu, Kameng and Subansiri.

**
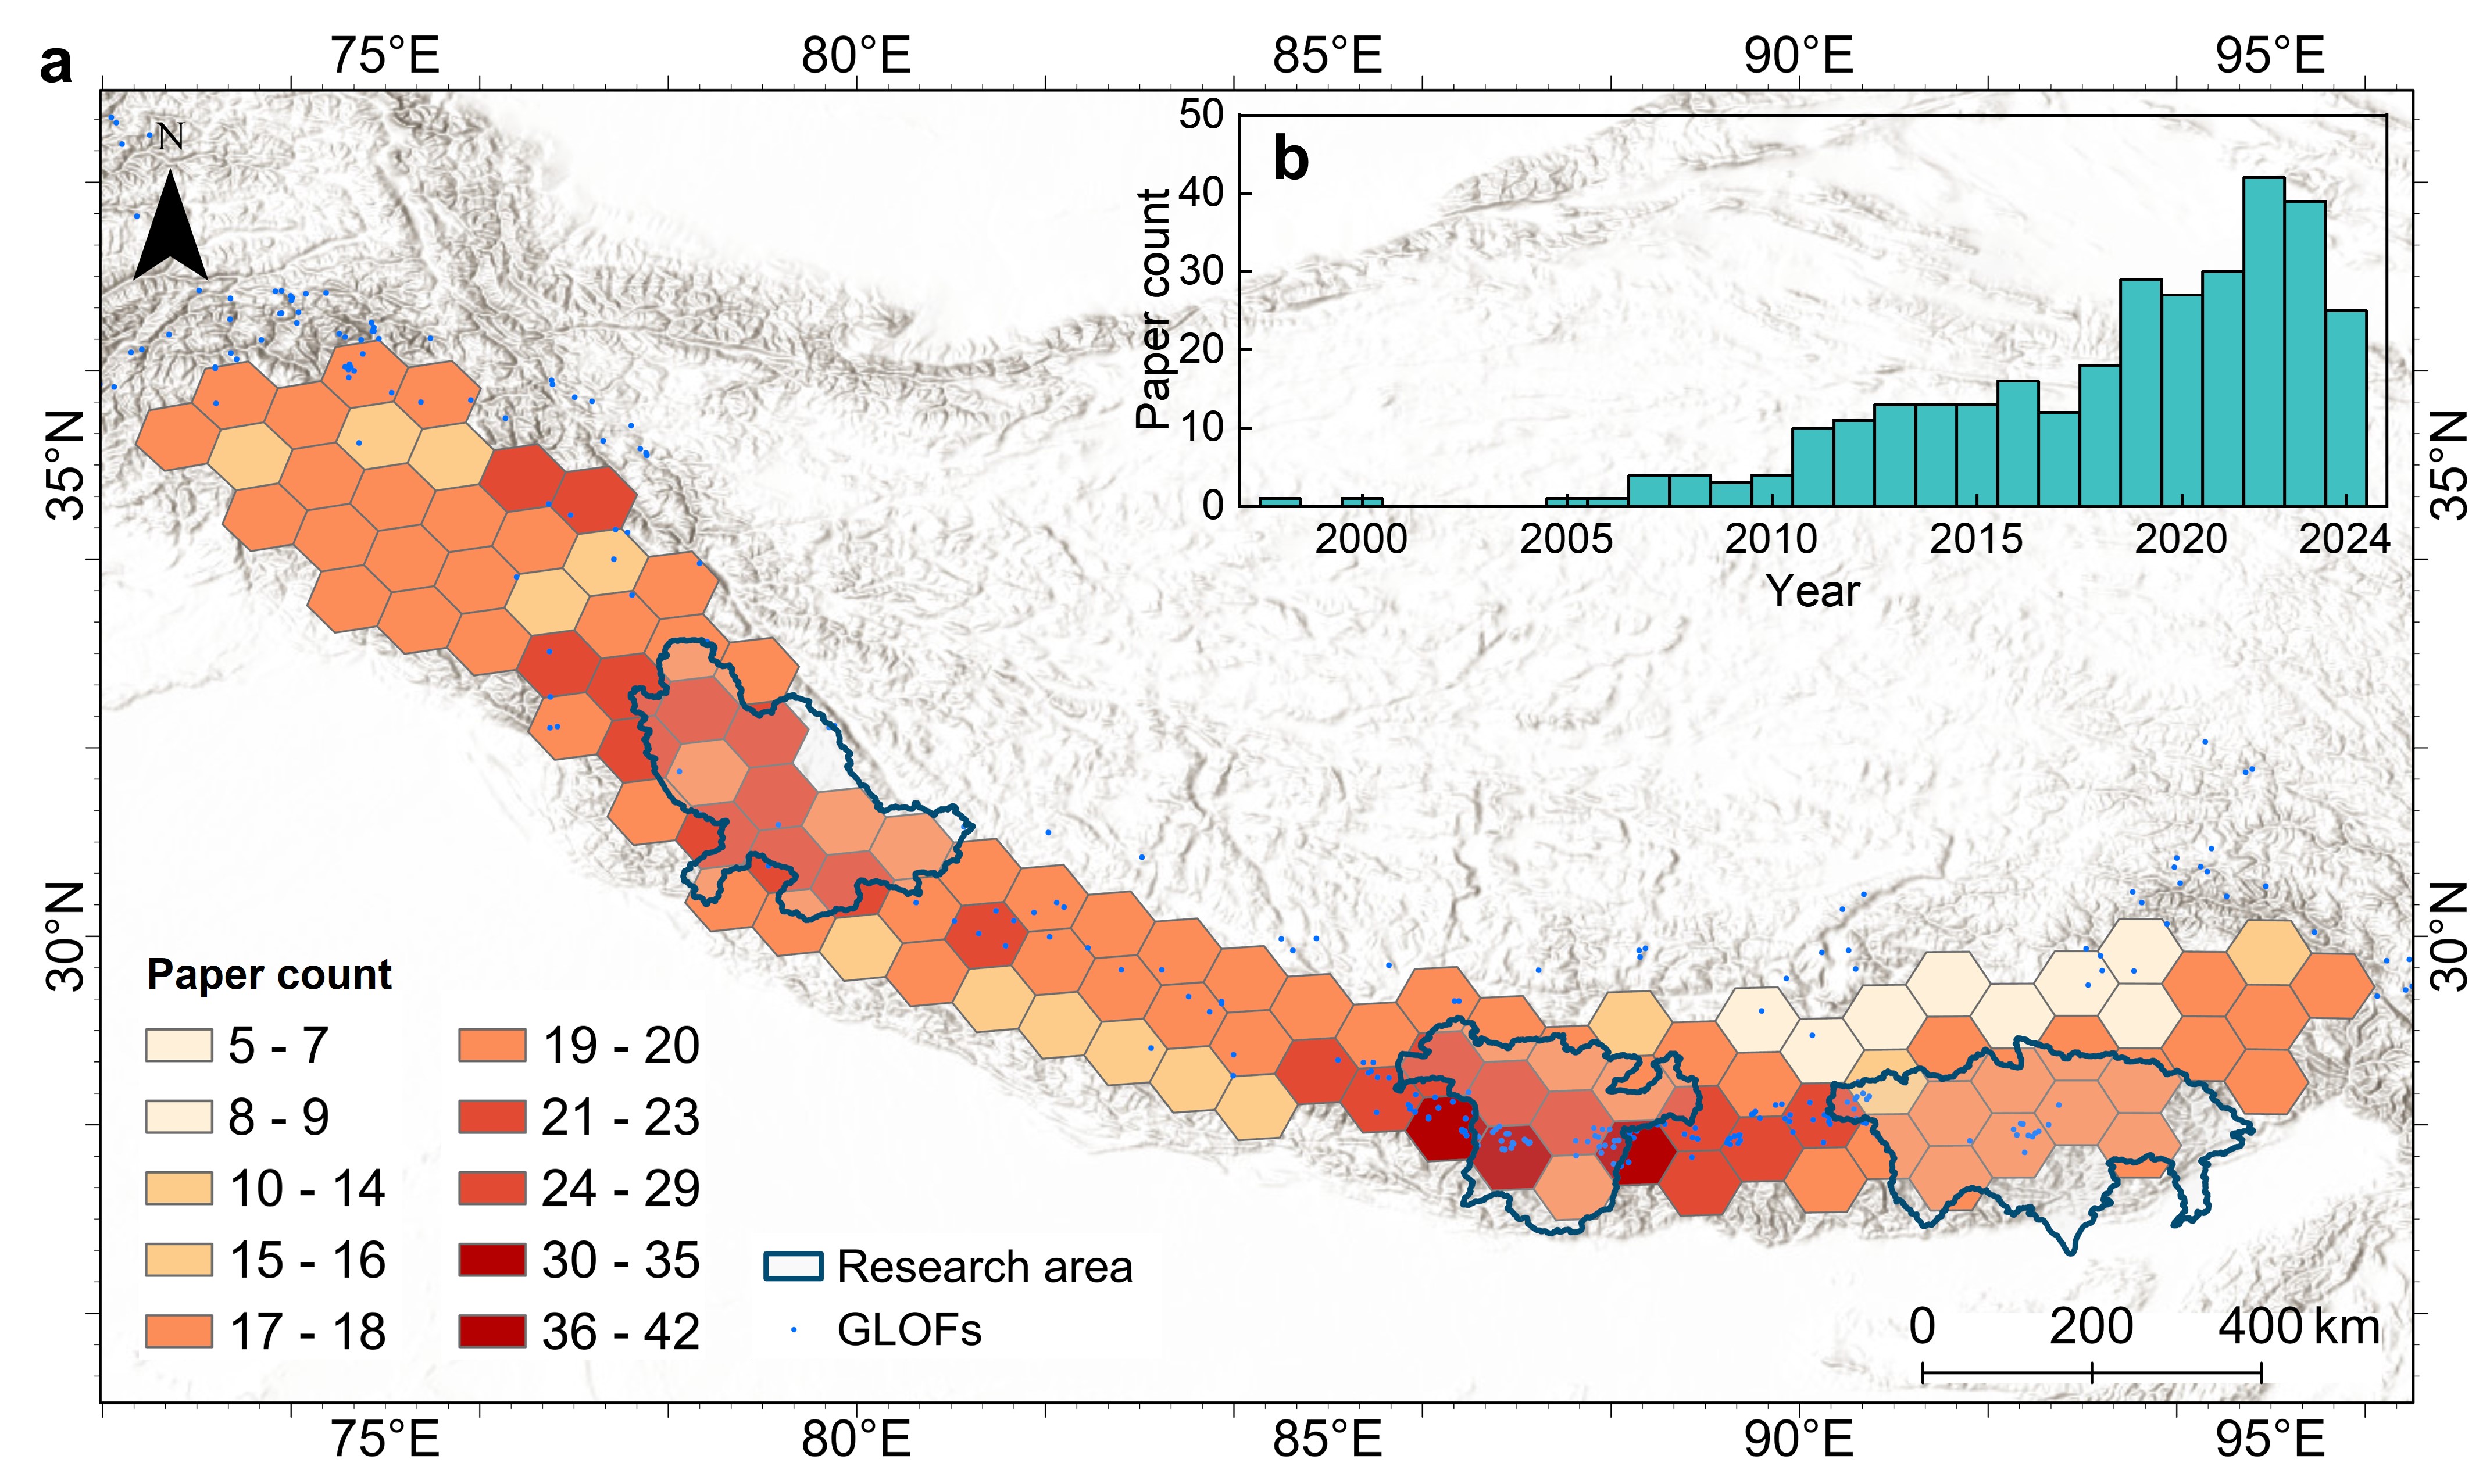
**

**Supplementary Figure 2 | a** The distribution and count of research papers related to GLOFs in the Himalayas, the literature statistics data is sourced from Web of Science (https://webofscience.clarivate.cn/). The hexagonal grid map shows the geographical concentration of GLOF studies, with each hexagon representing the number of research papers. **b** The inset bar graph provides a temporal trend of GLOF-related publications from 1995 to 2024.


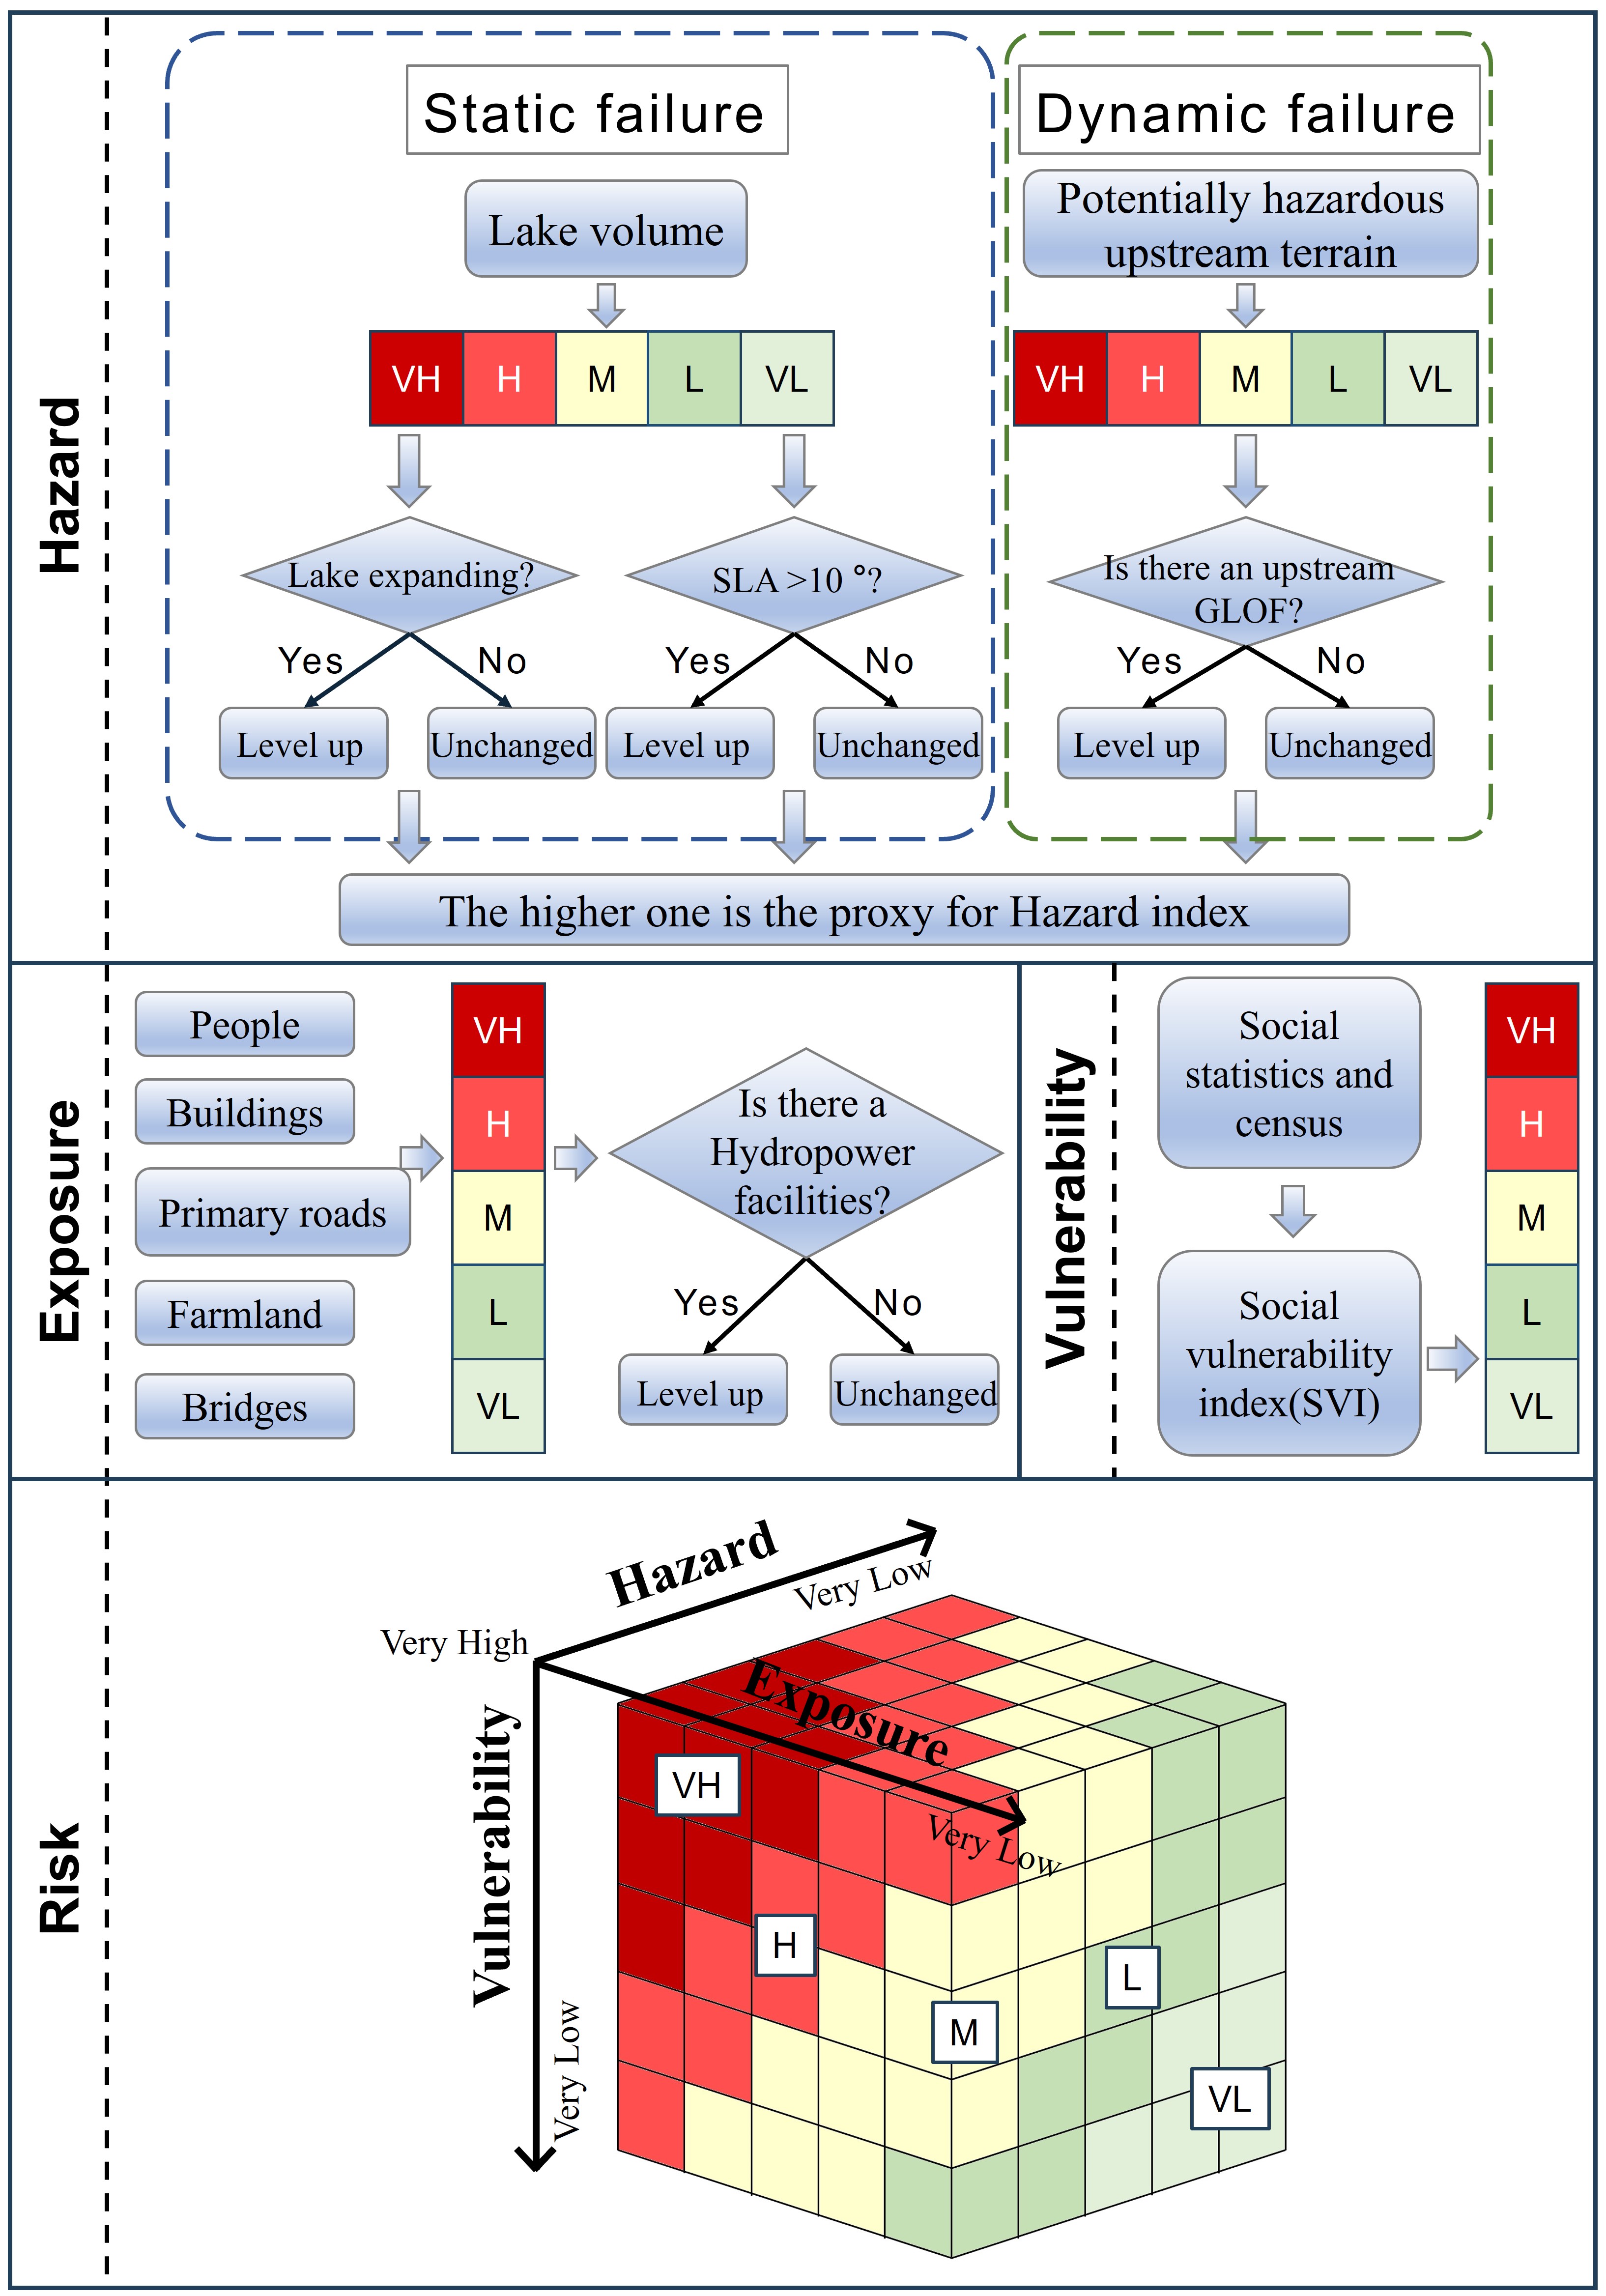


**Supplementary Figure 3 | Workflow for calculating the Hazard, Exposure, and Vulnerability index of each glacial lake.** 'VH' for 'Very High', 'H' for 'High', 'M' for 'Medium', 'L' for 'Low', and 'VL' for 'Very Low'.


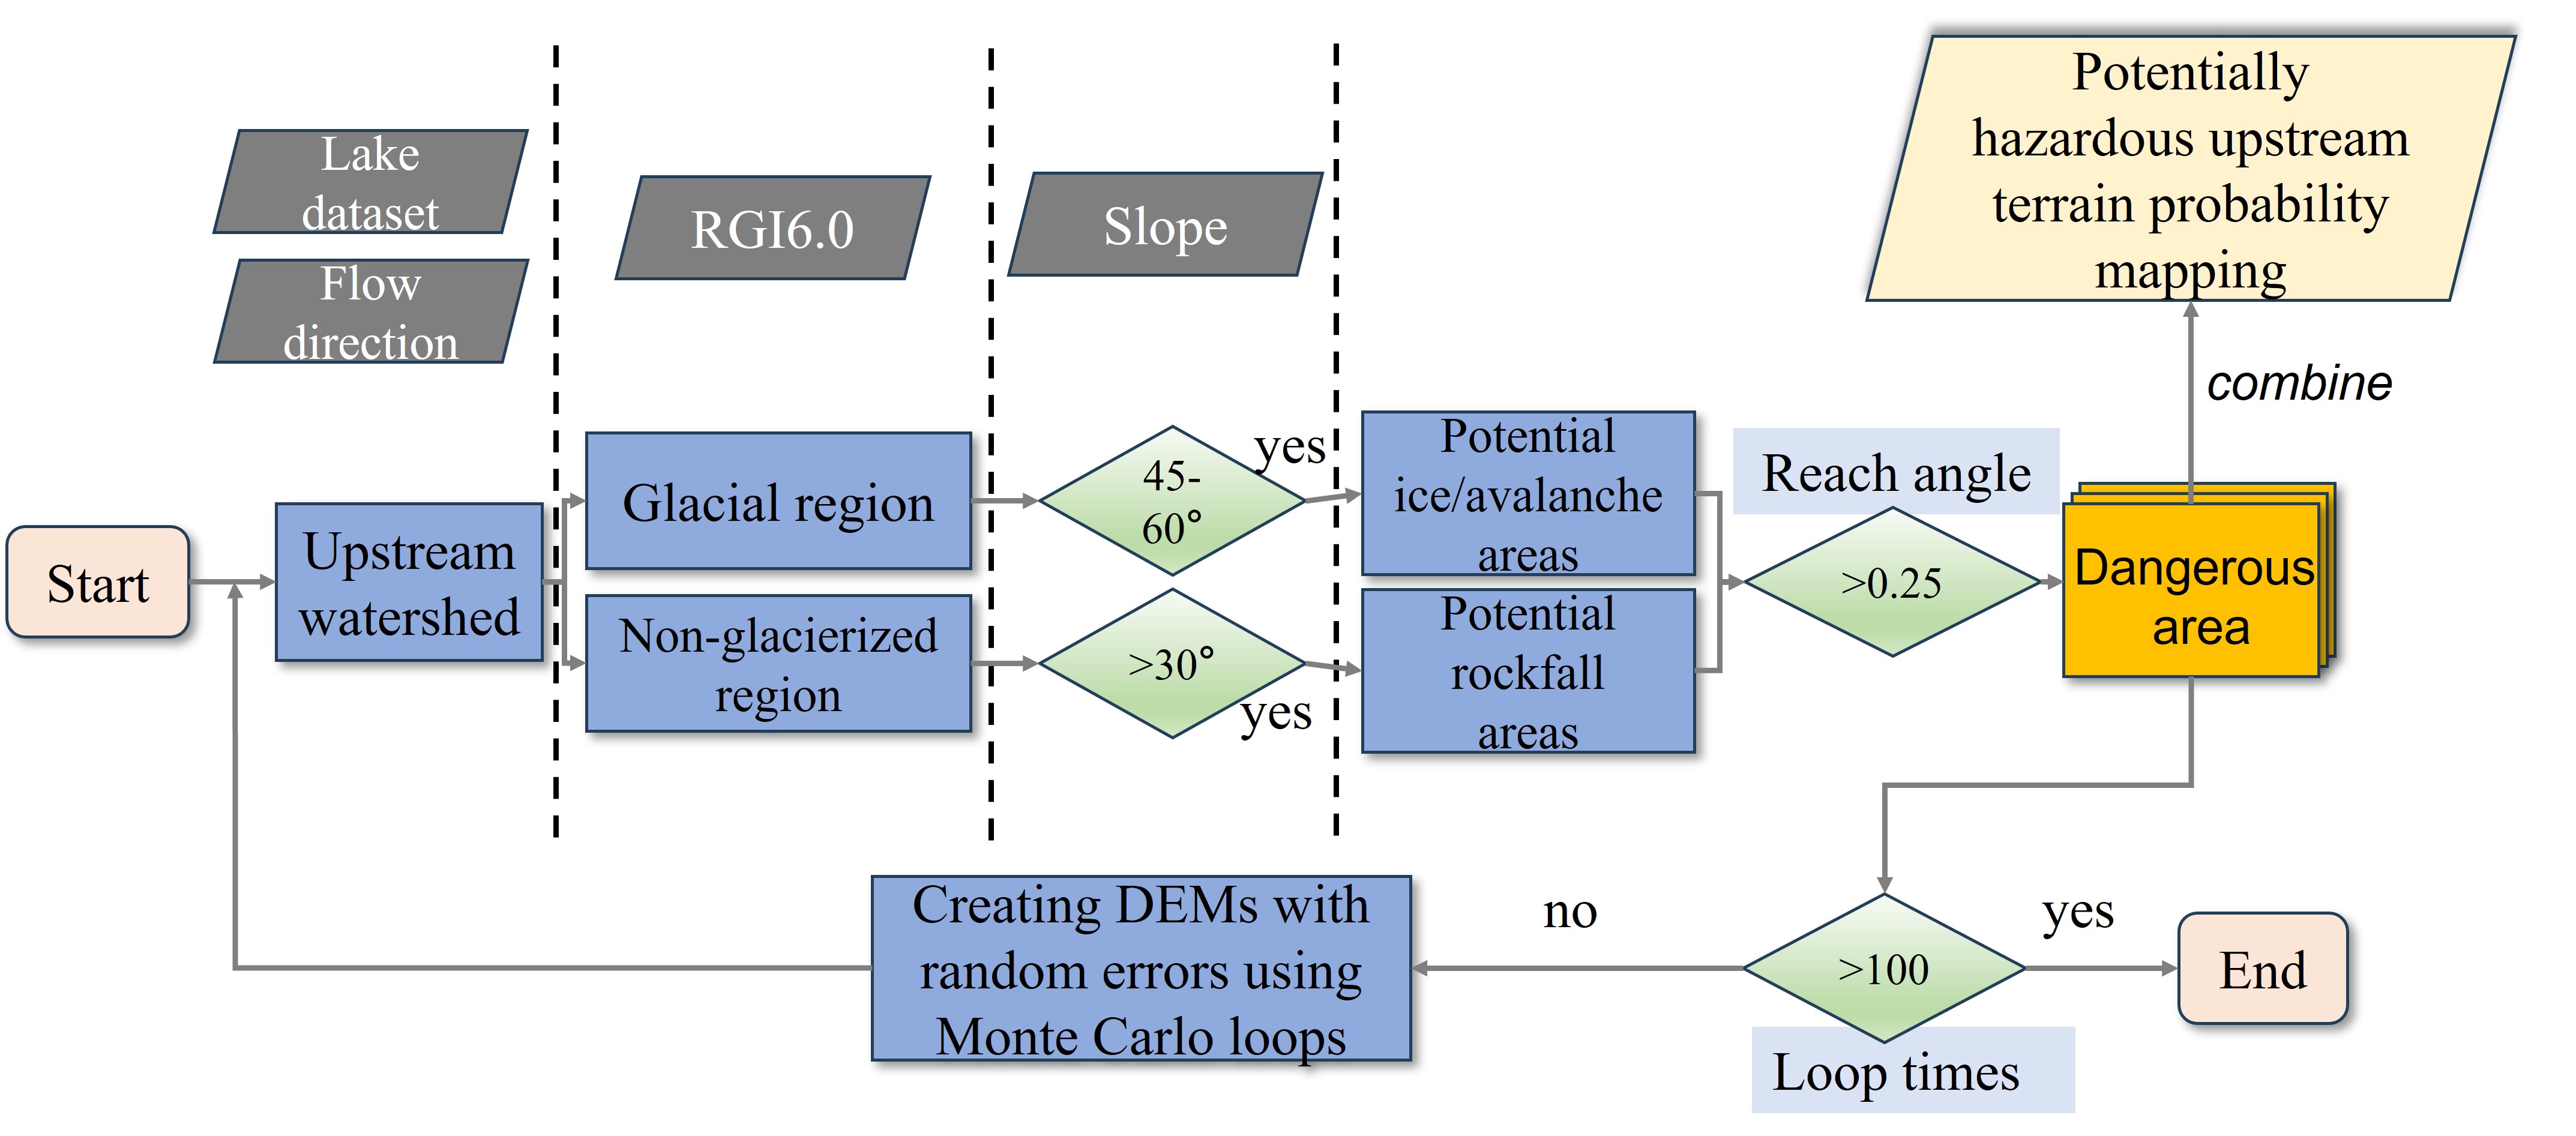


**Supplementary Figure 4 | Workflow for the extraction of PHUT with DEM uncertainty using Monte Carlo loop.** The process involves 100 iterations with a RMSE of 5 m.


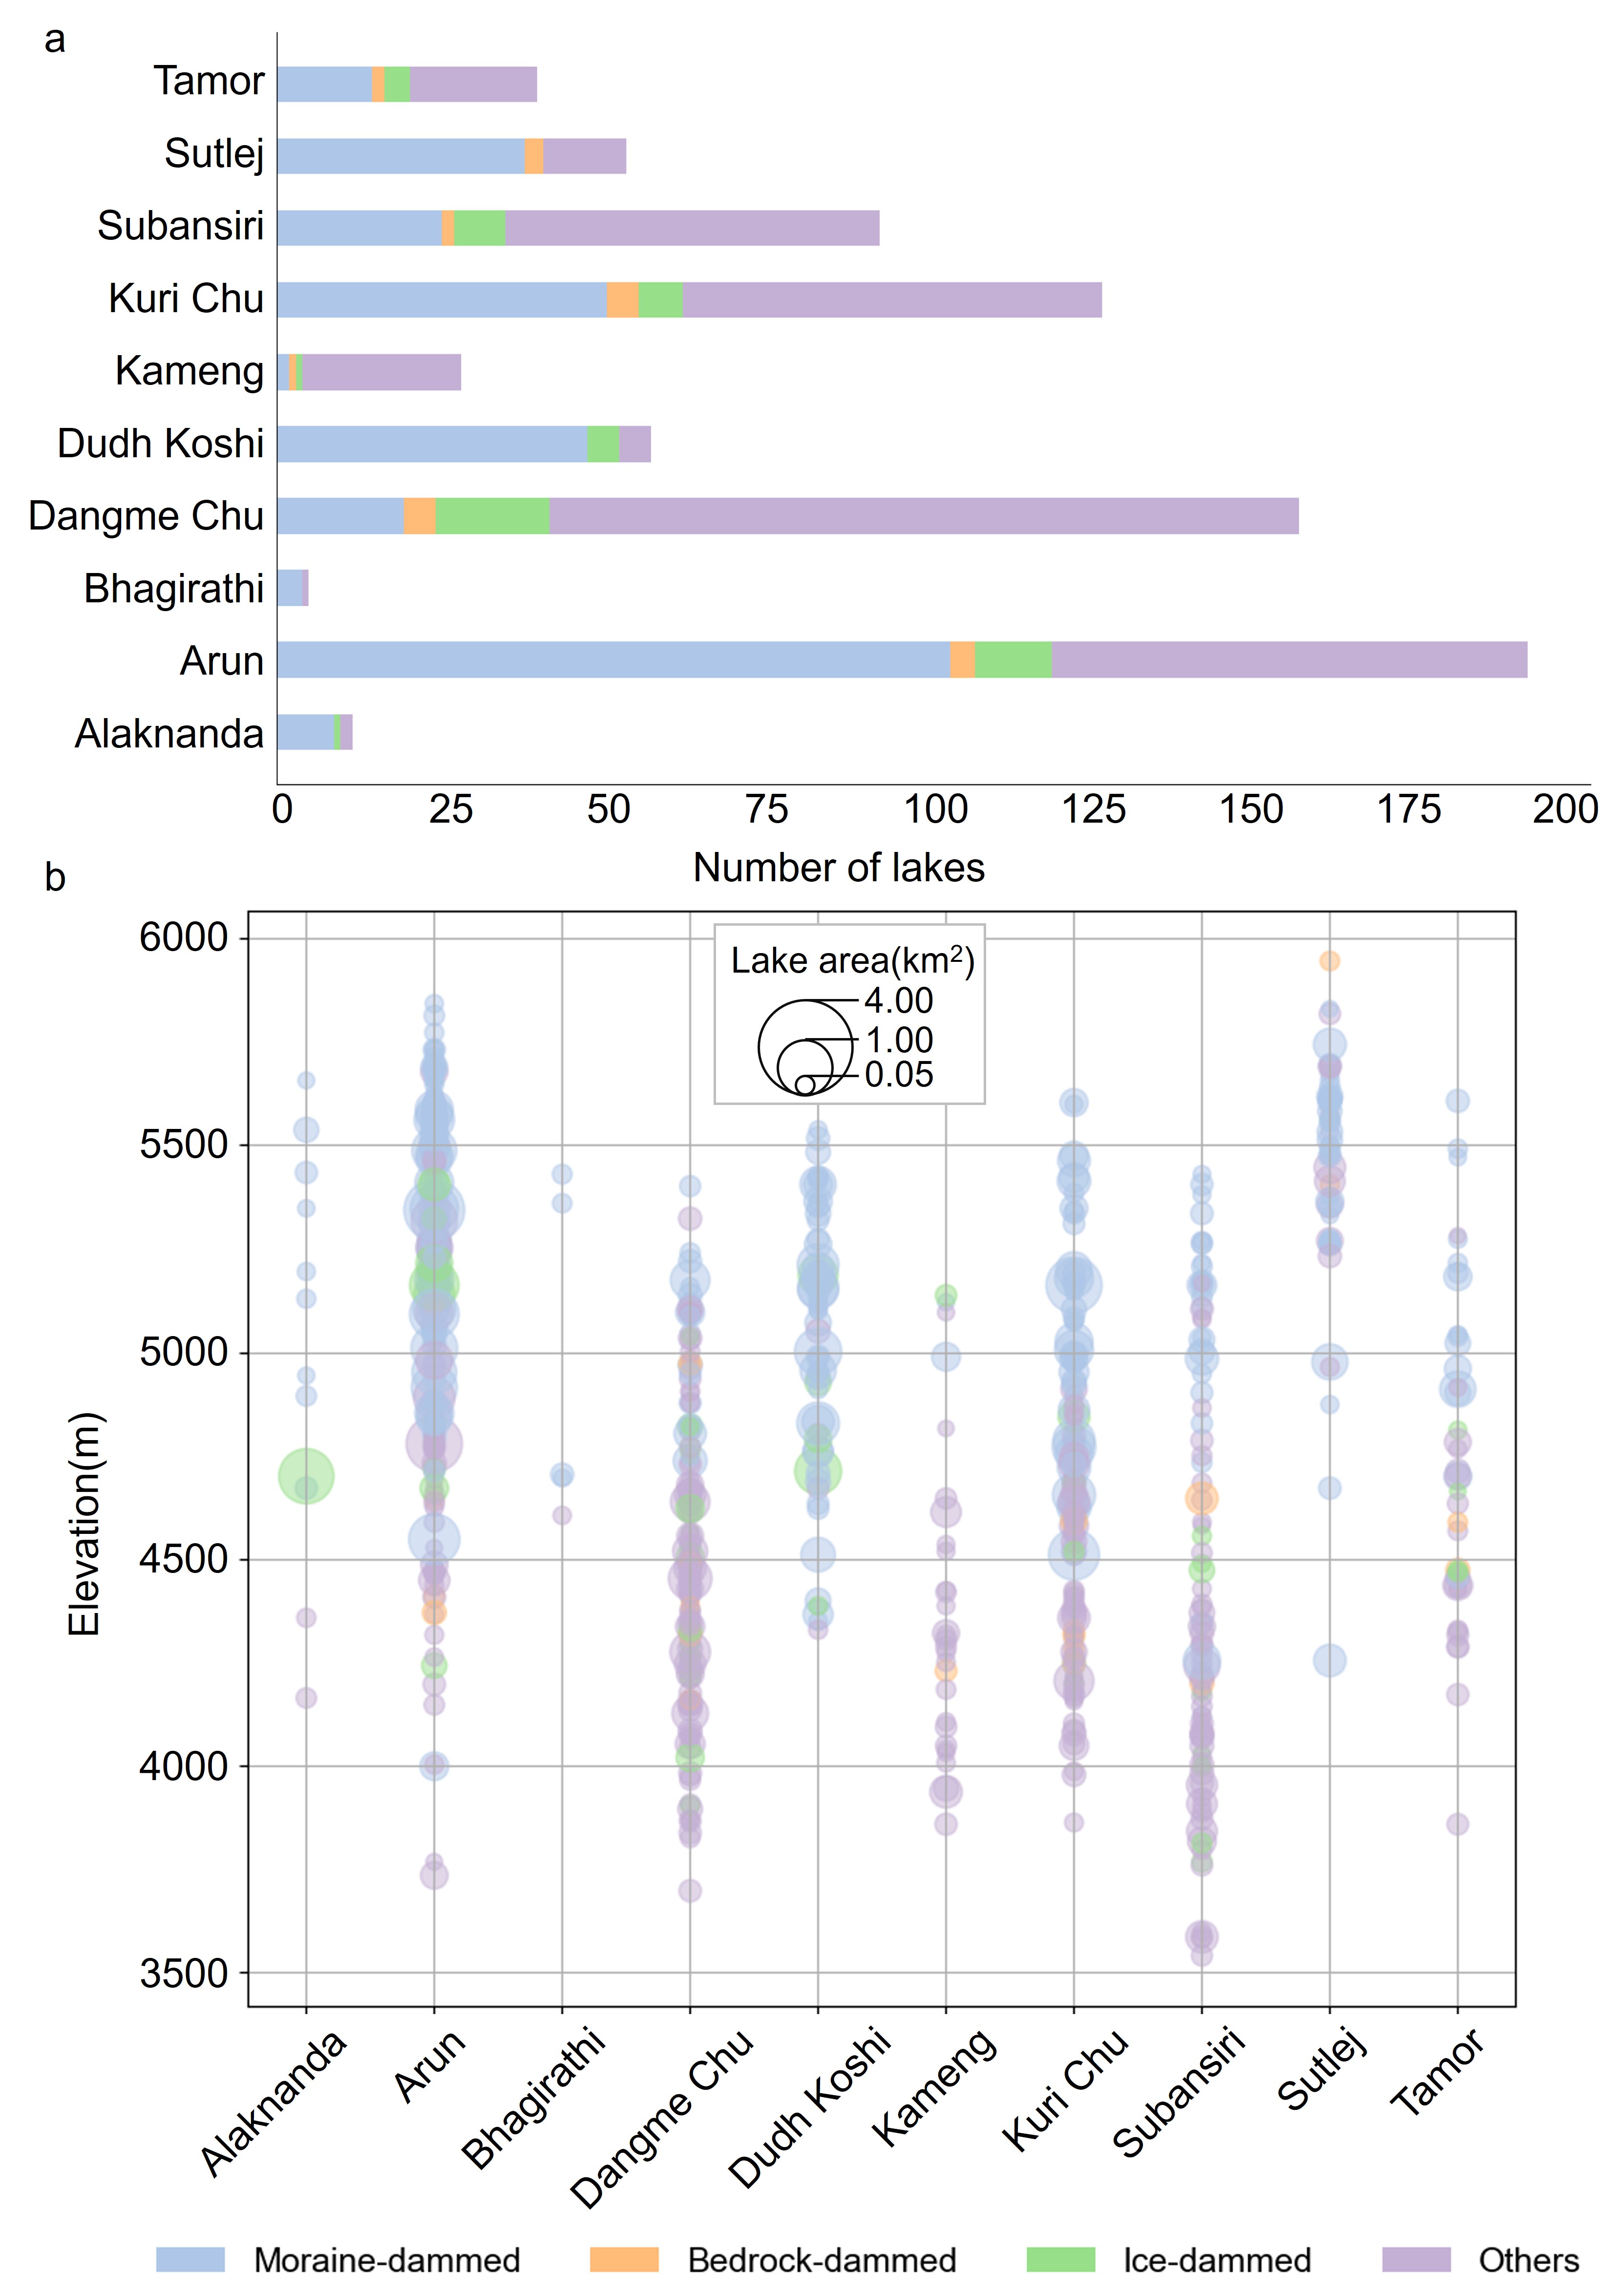


**Supplementary Figure 5 | Types and altitude distribution of glacial lakes in the study area. a** The bar chart displays the number and type of glacial lakes in each sub basin. **b** The bubble chart displays the elevation information of glacial lakes in each sub basin, and the size of the bubbles represents the area of glacial lakes


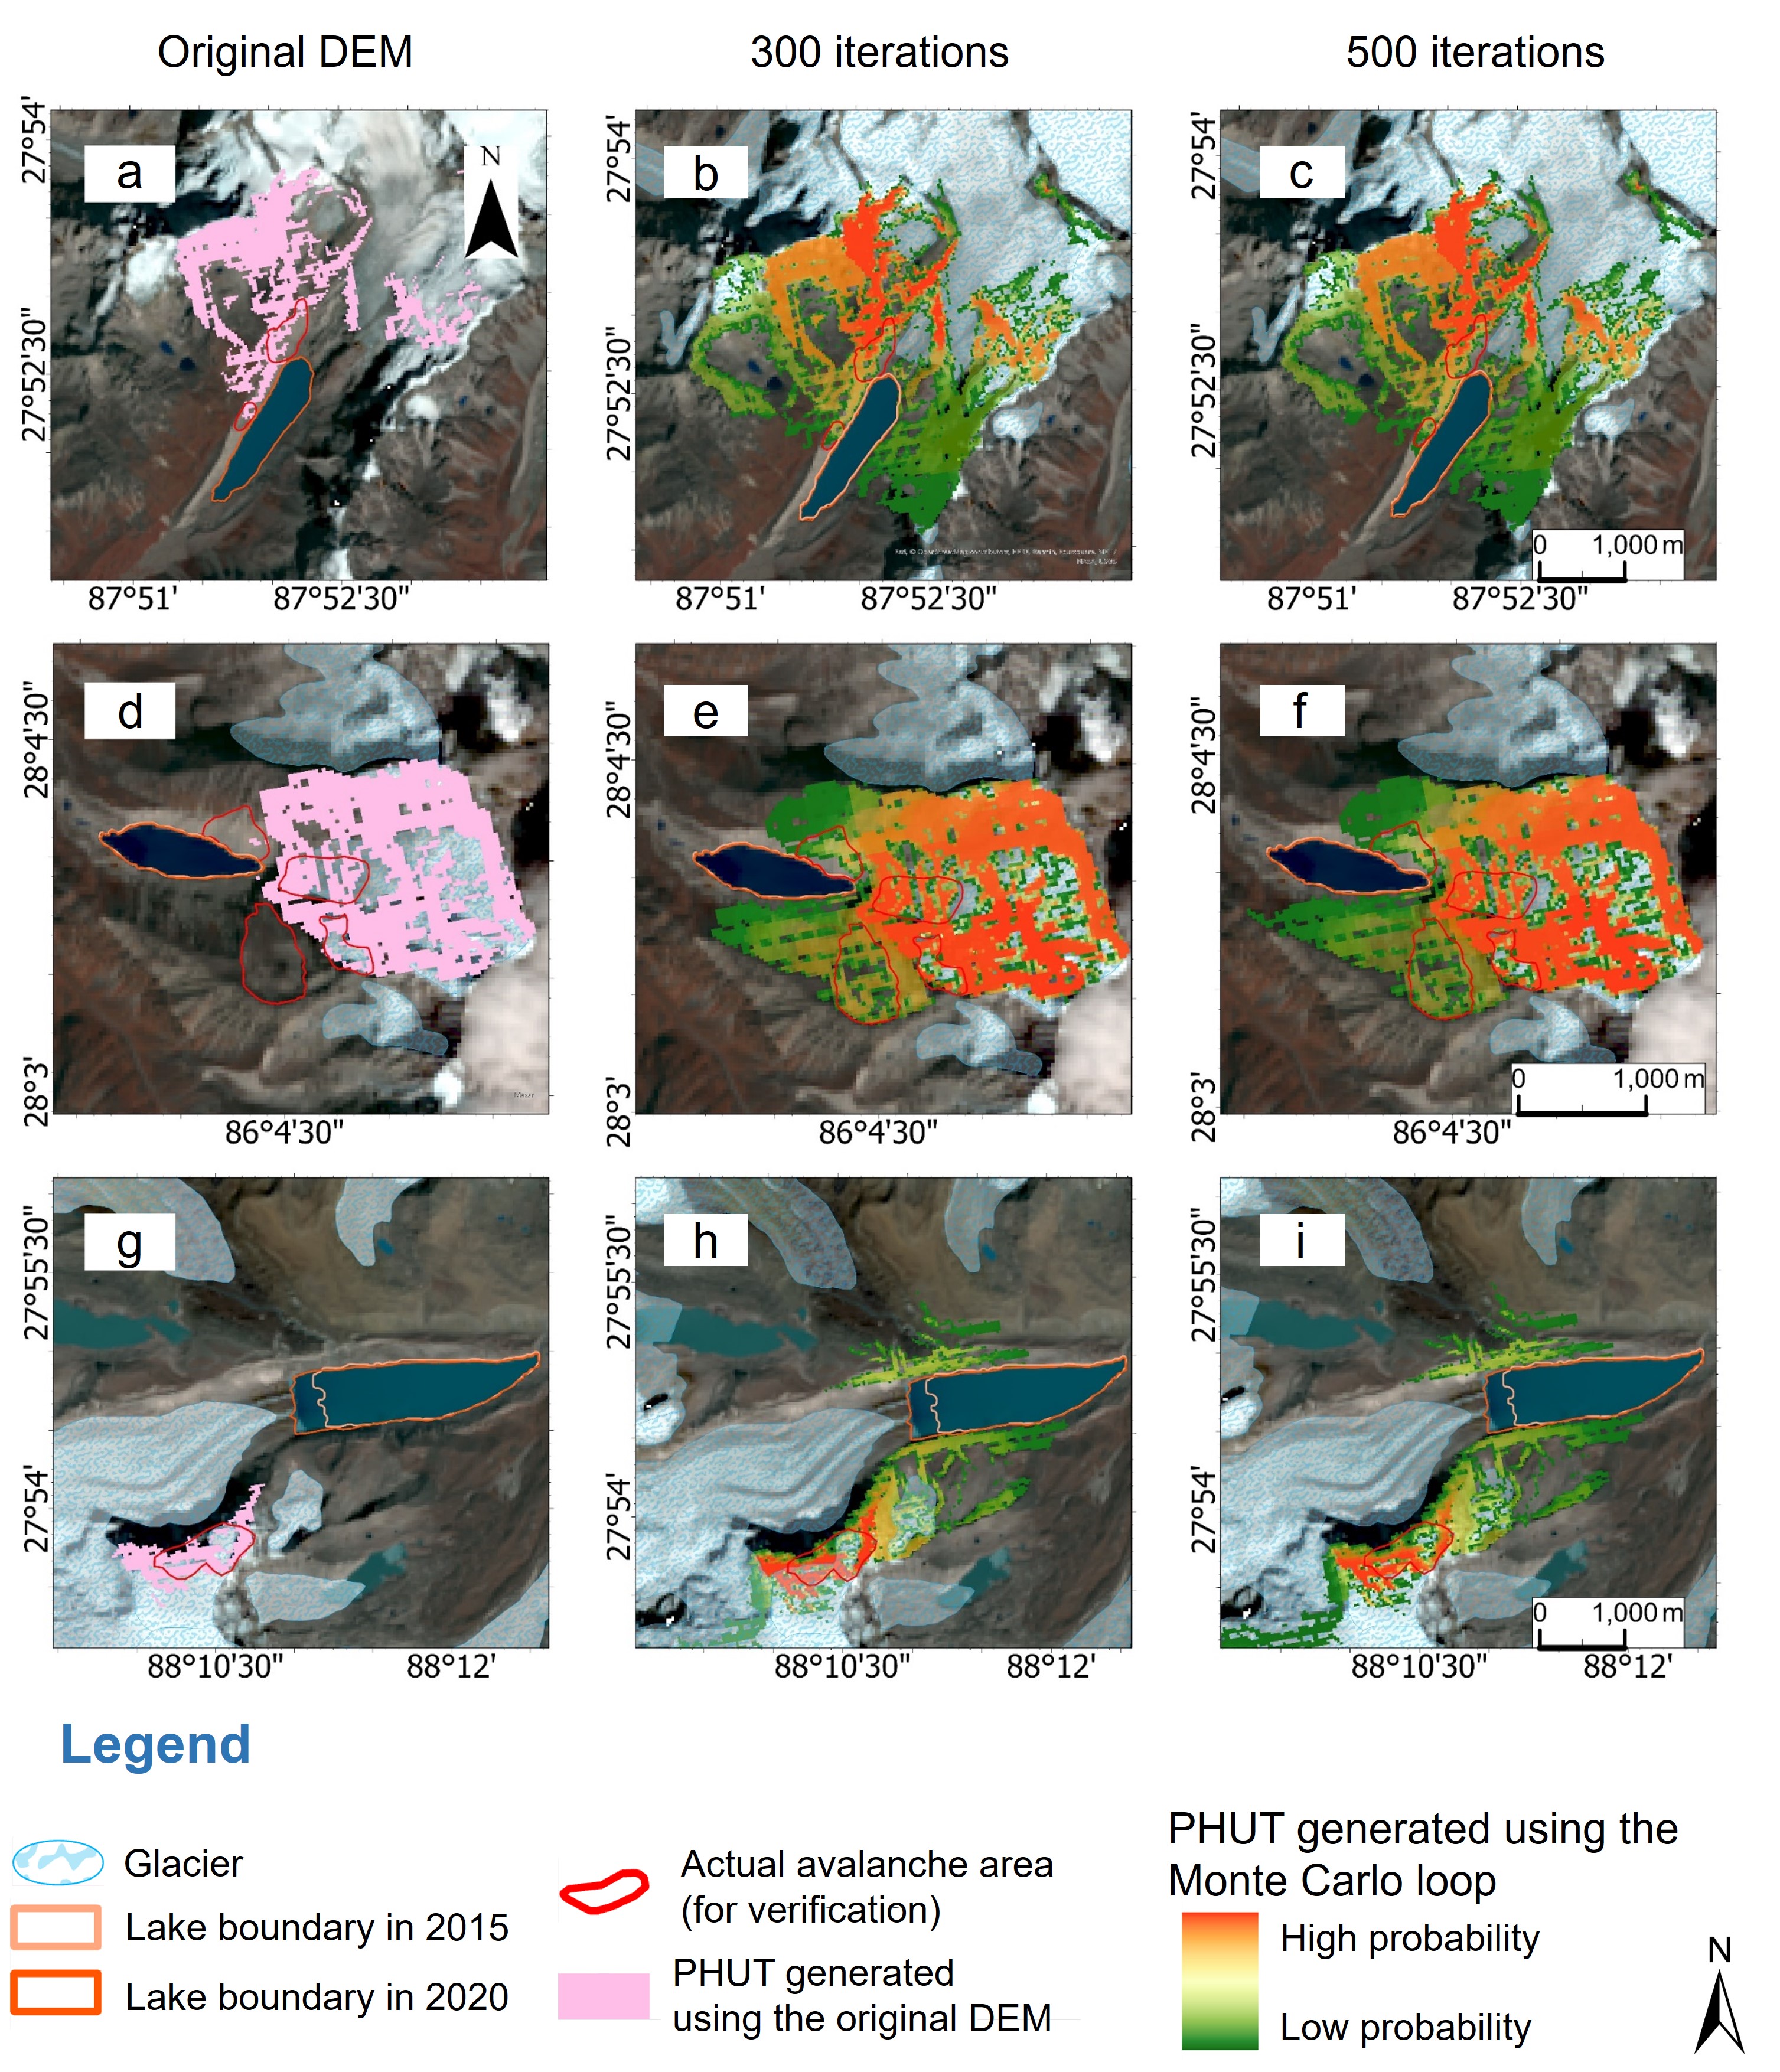


**Supplementary Figure 6 | Three glacial lakes that have experienced GLOF (triggered by ice/avalanche or rockfall) were used to calculate the PHUT area using two methods. a-c** Nagama Pokhari lake. **d-f** Cirenmaco lake. **g-i** South Lhonak lake. The pink areas mean the PHUT extracted using the original DEM, the gradient areas mean considering DEM uncertainty, and the red boundaries mean the actual area where avalanches occur.


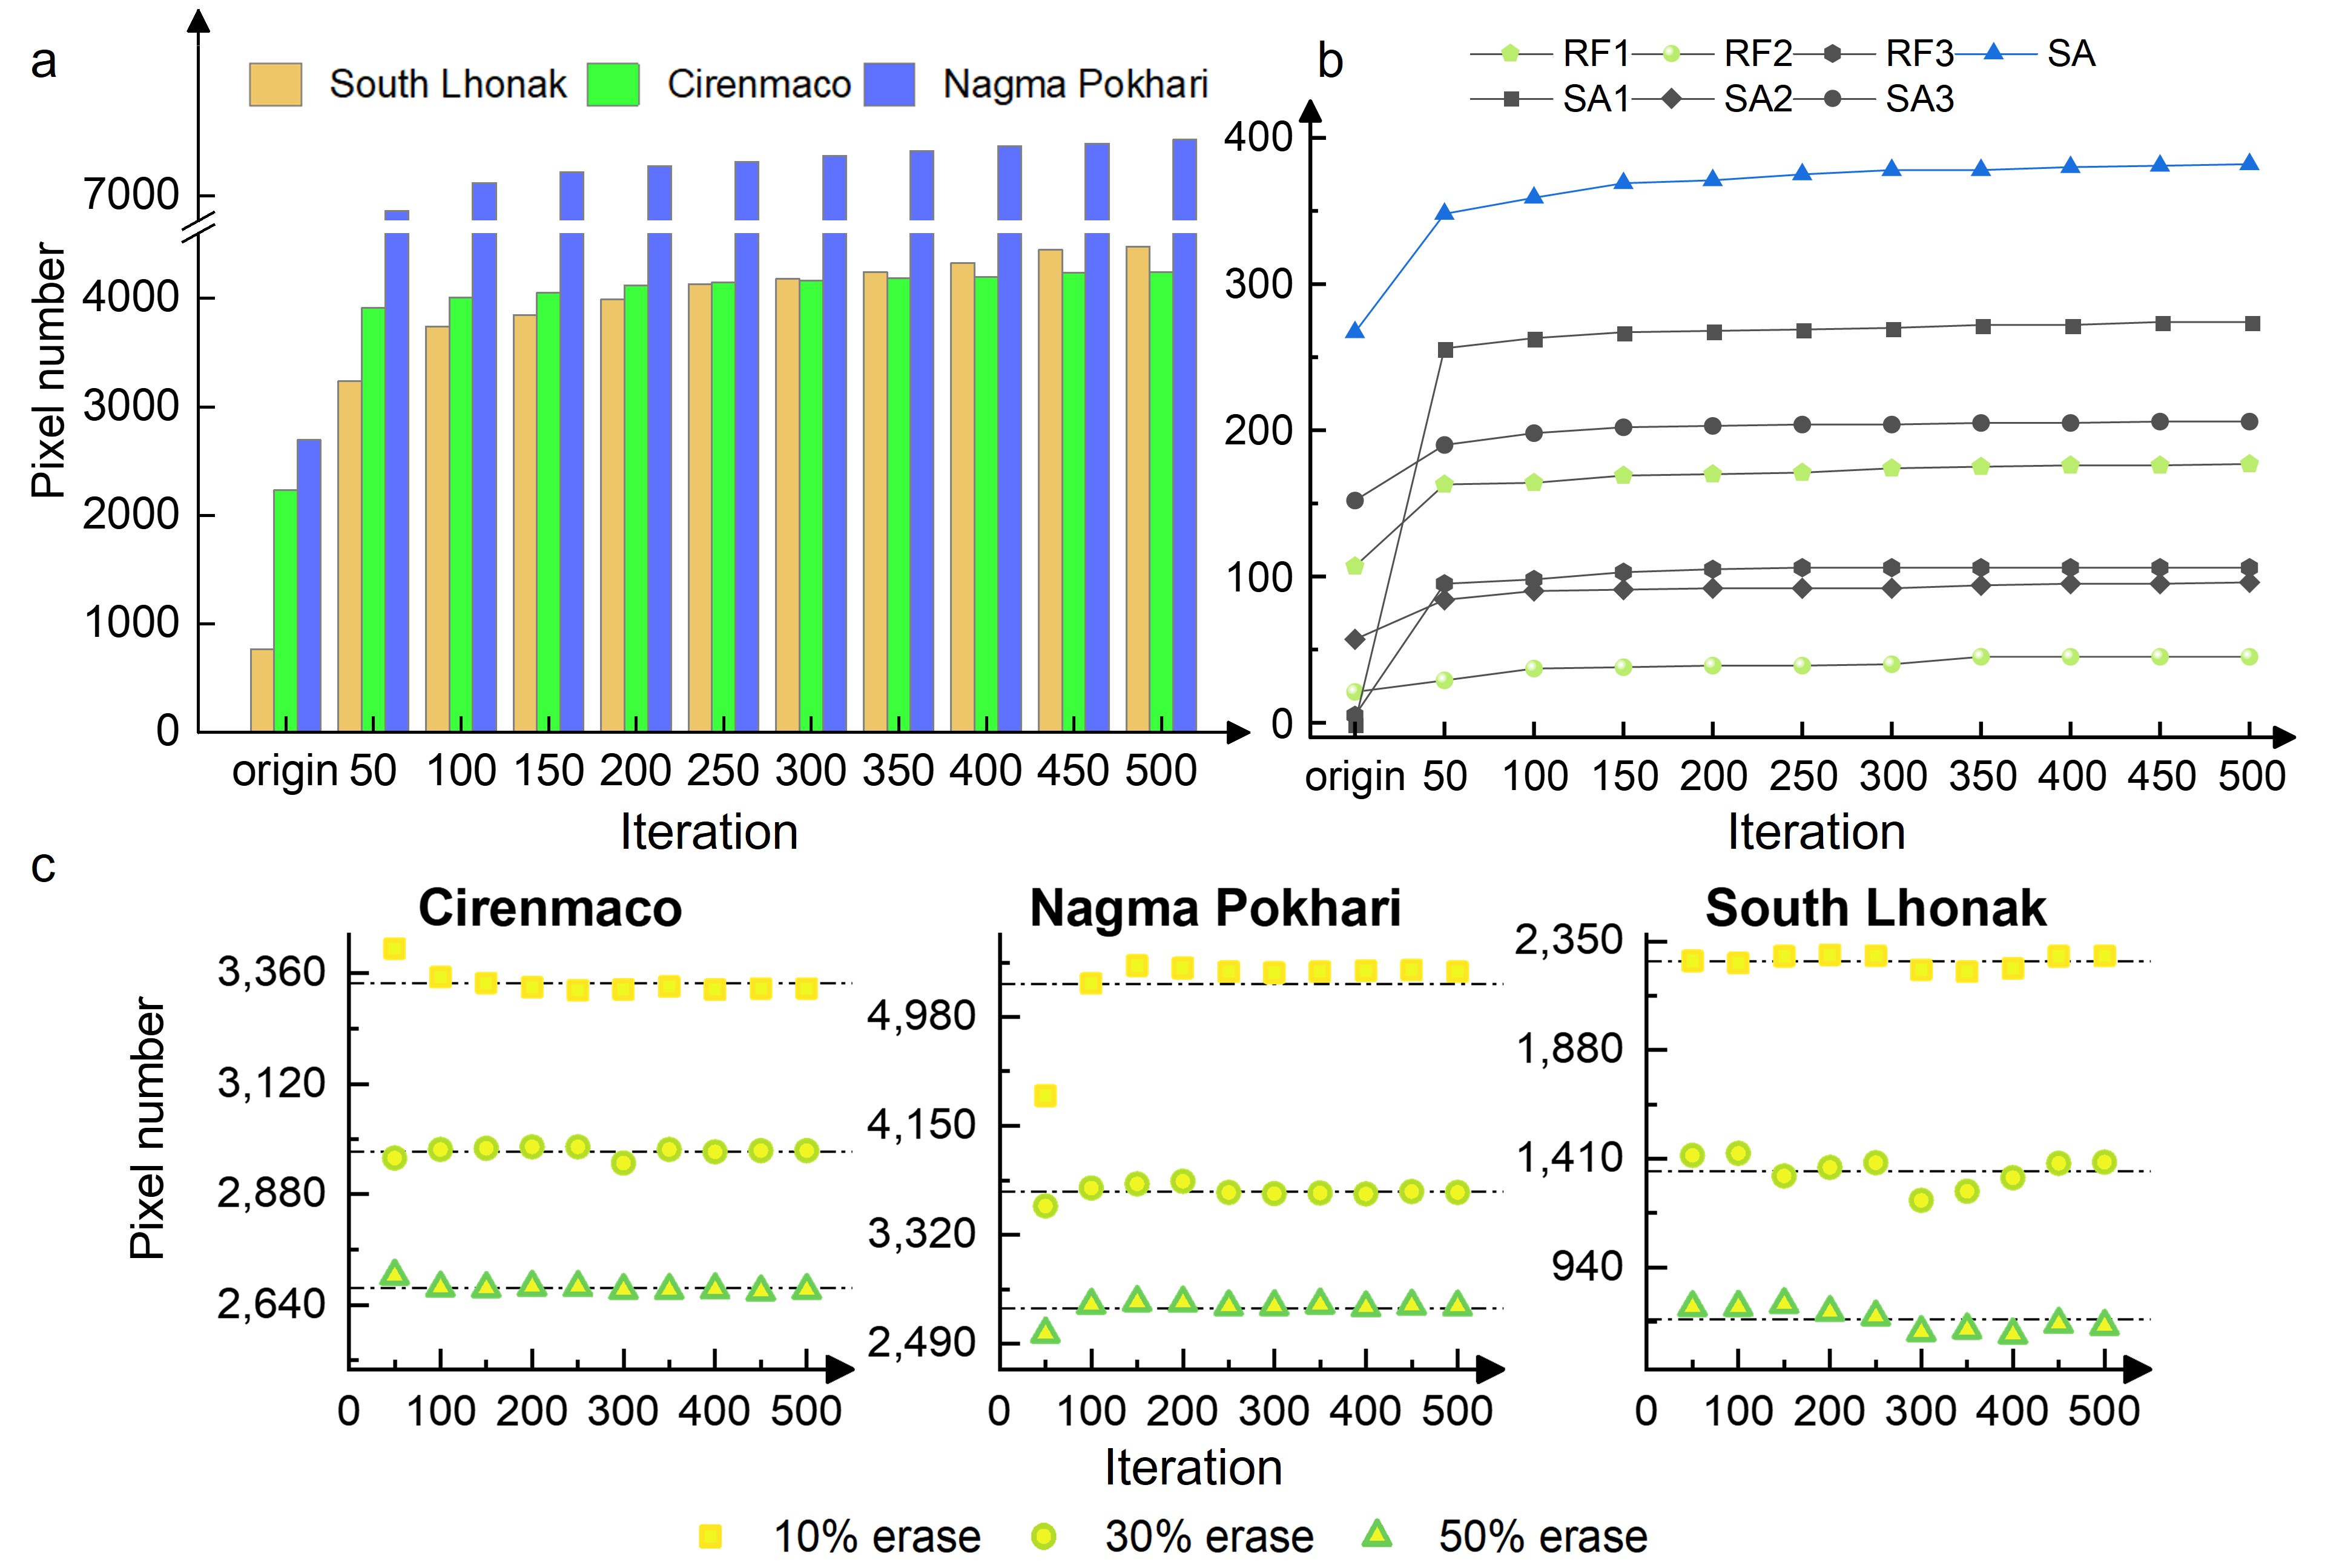


**Supplementary Figure 7 | The relationship between the number of pixels and iterations in PHUT.** **a** Relationship between iteration count and coverage of PHUT pixels. **b** Coverage of PHUT pixels in seven collapse areas, RF: rockfall, SA: snow/ice avalanche. **c** Coverage after removing 10%, 20%, 50% of PHUT pixels below the maximum pixel value.


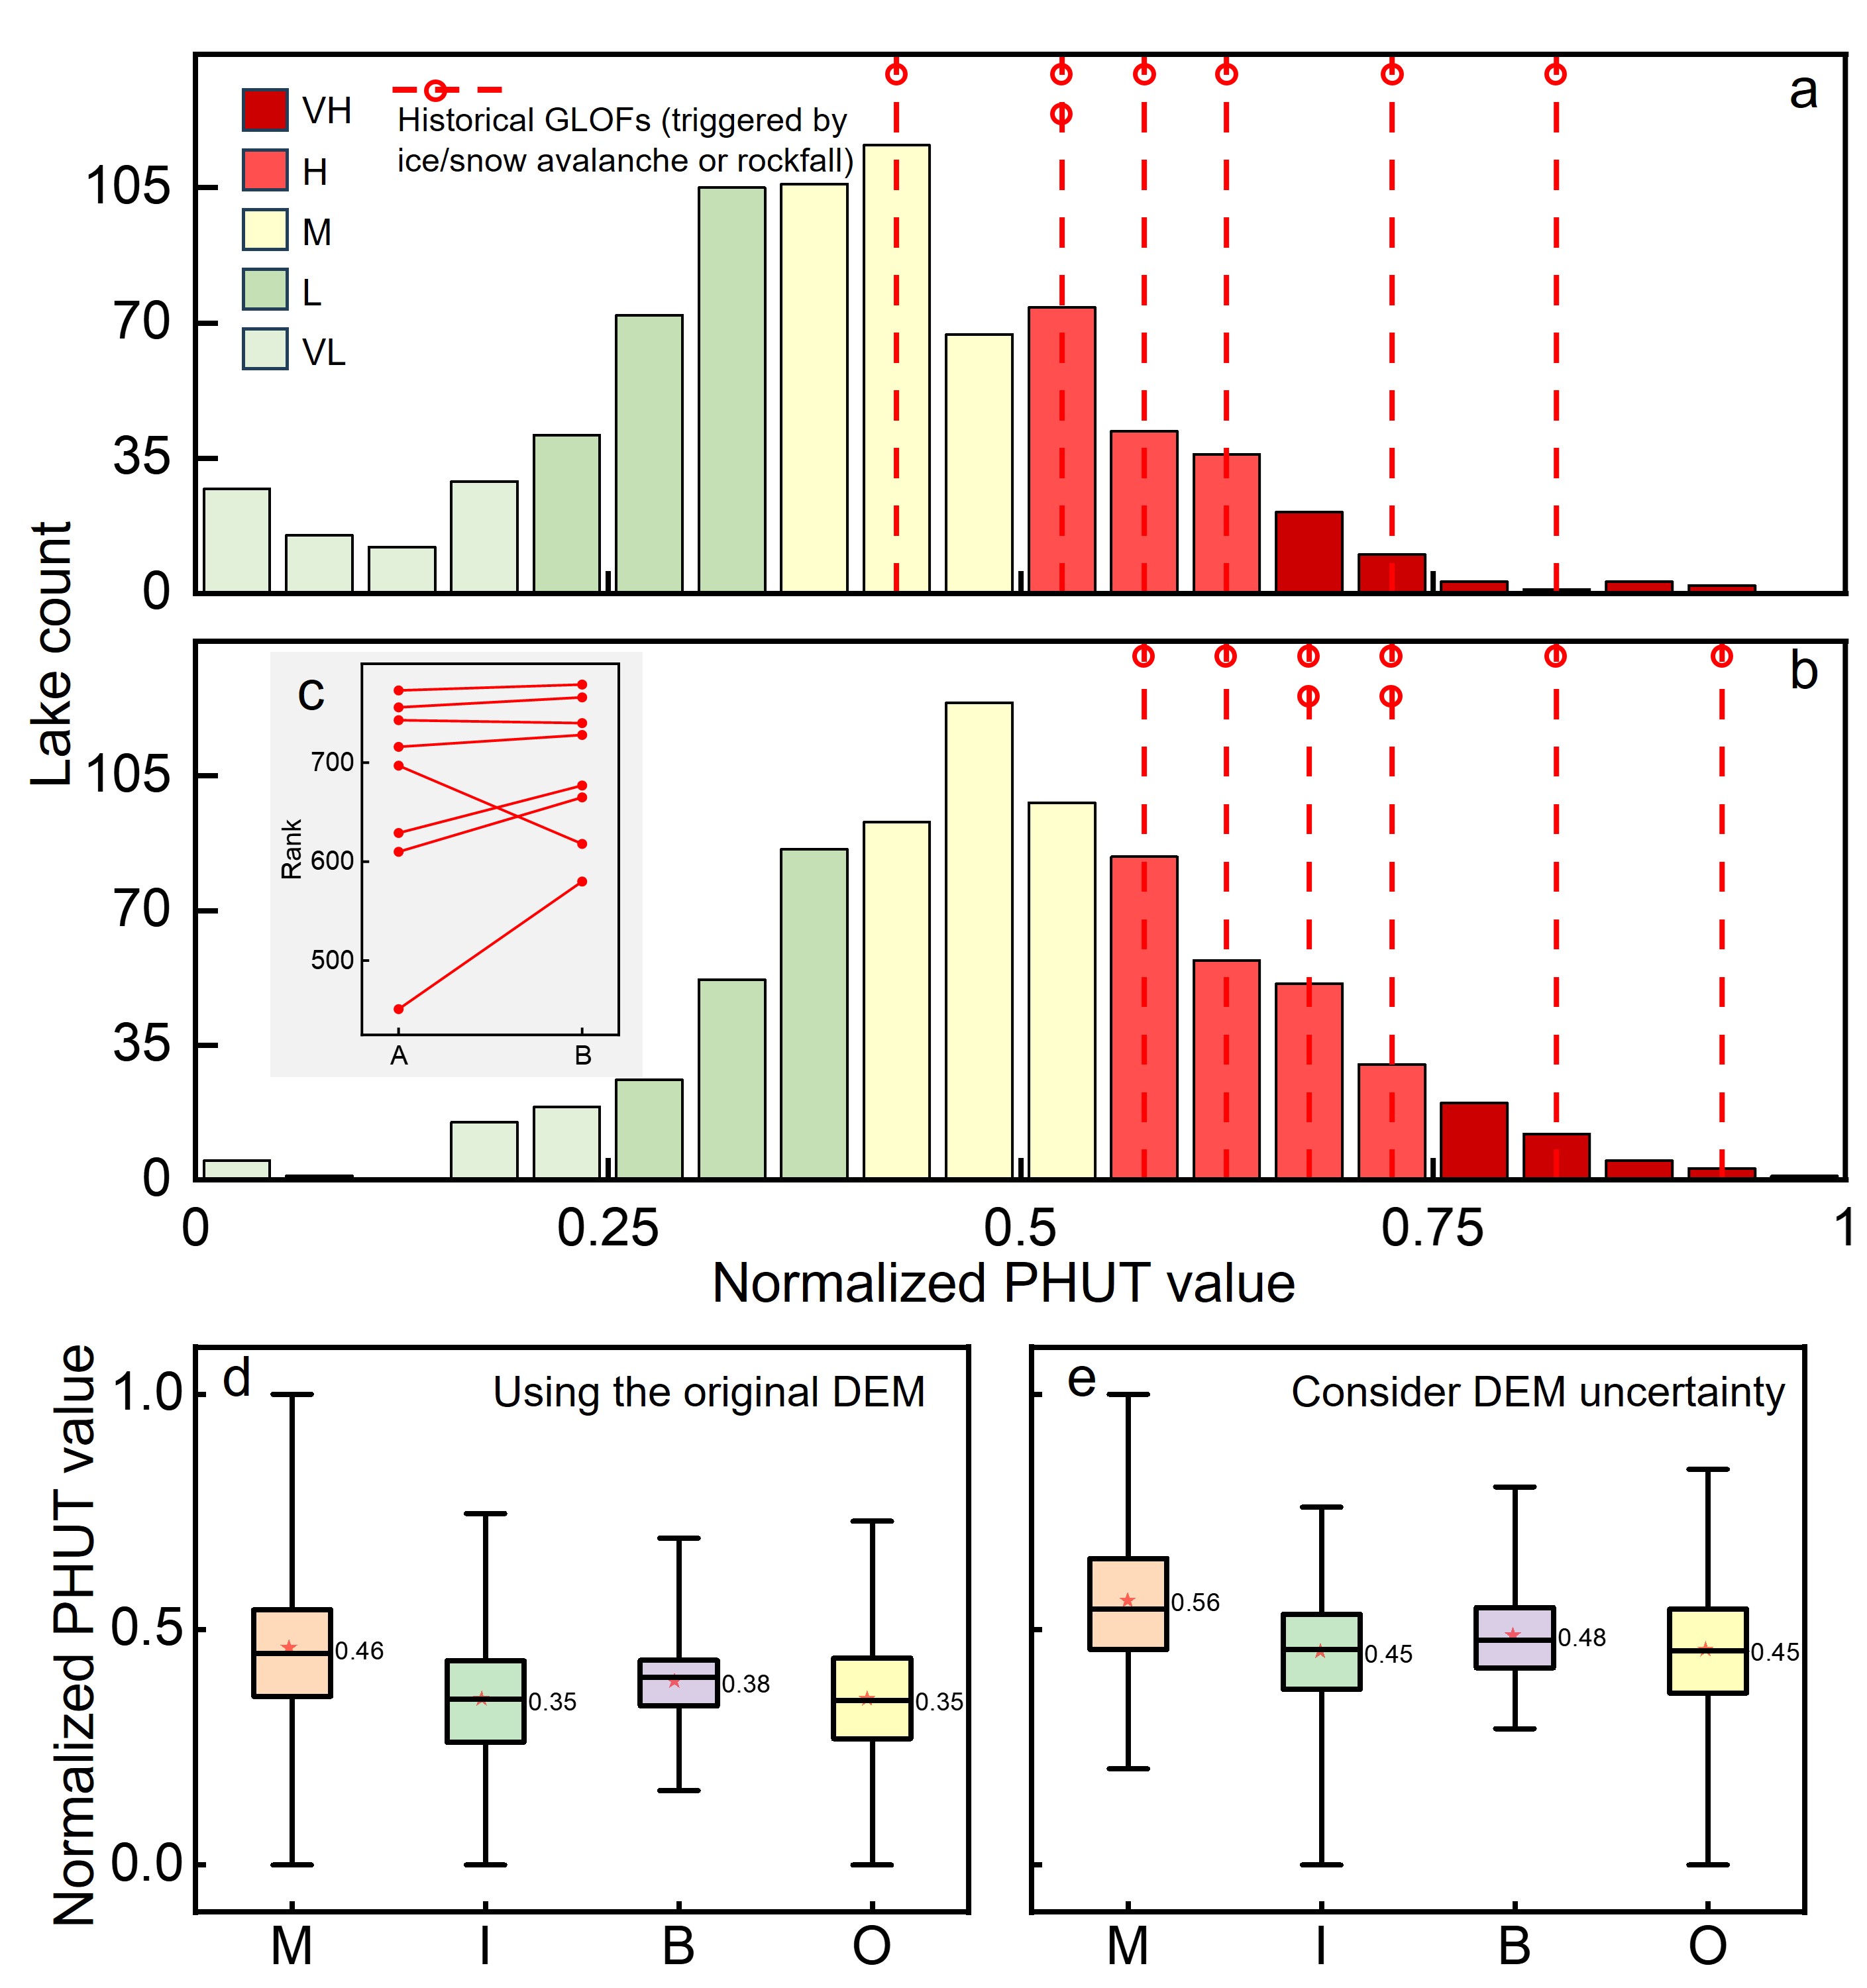


**Supplementary Figure 8 | Normalize the PHUT index ranking of 8 historical GLOFs (triggered by ice/snow avalanche or rock avalanche) in the assessment of all glacial lakes.** **a** Using the original DEM. **b** Calculated with DEM uncertainty. **c** Ranking changes of 8 historical GLOFs, A: using original DEM; B: calculated with DEM uncertainty. **d-e** PHUT distribution of four types of lakes, M: moraine-dammed,

I: ice-dammed, B: bed-dammed; O: others.


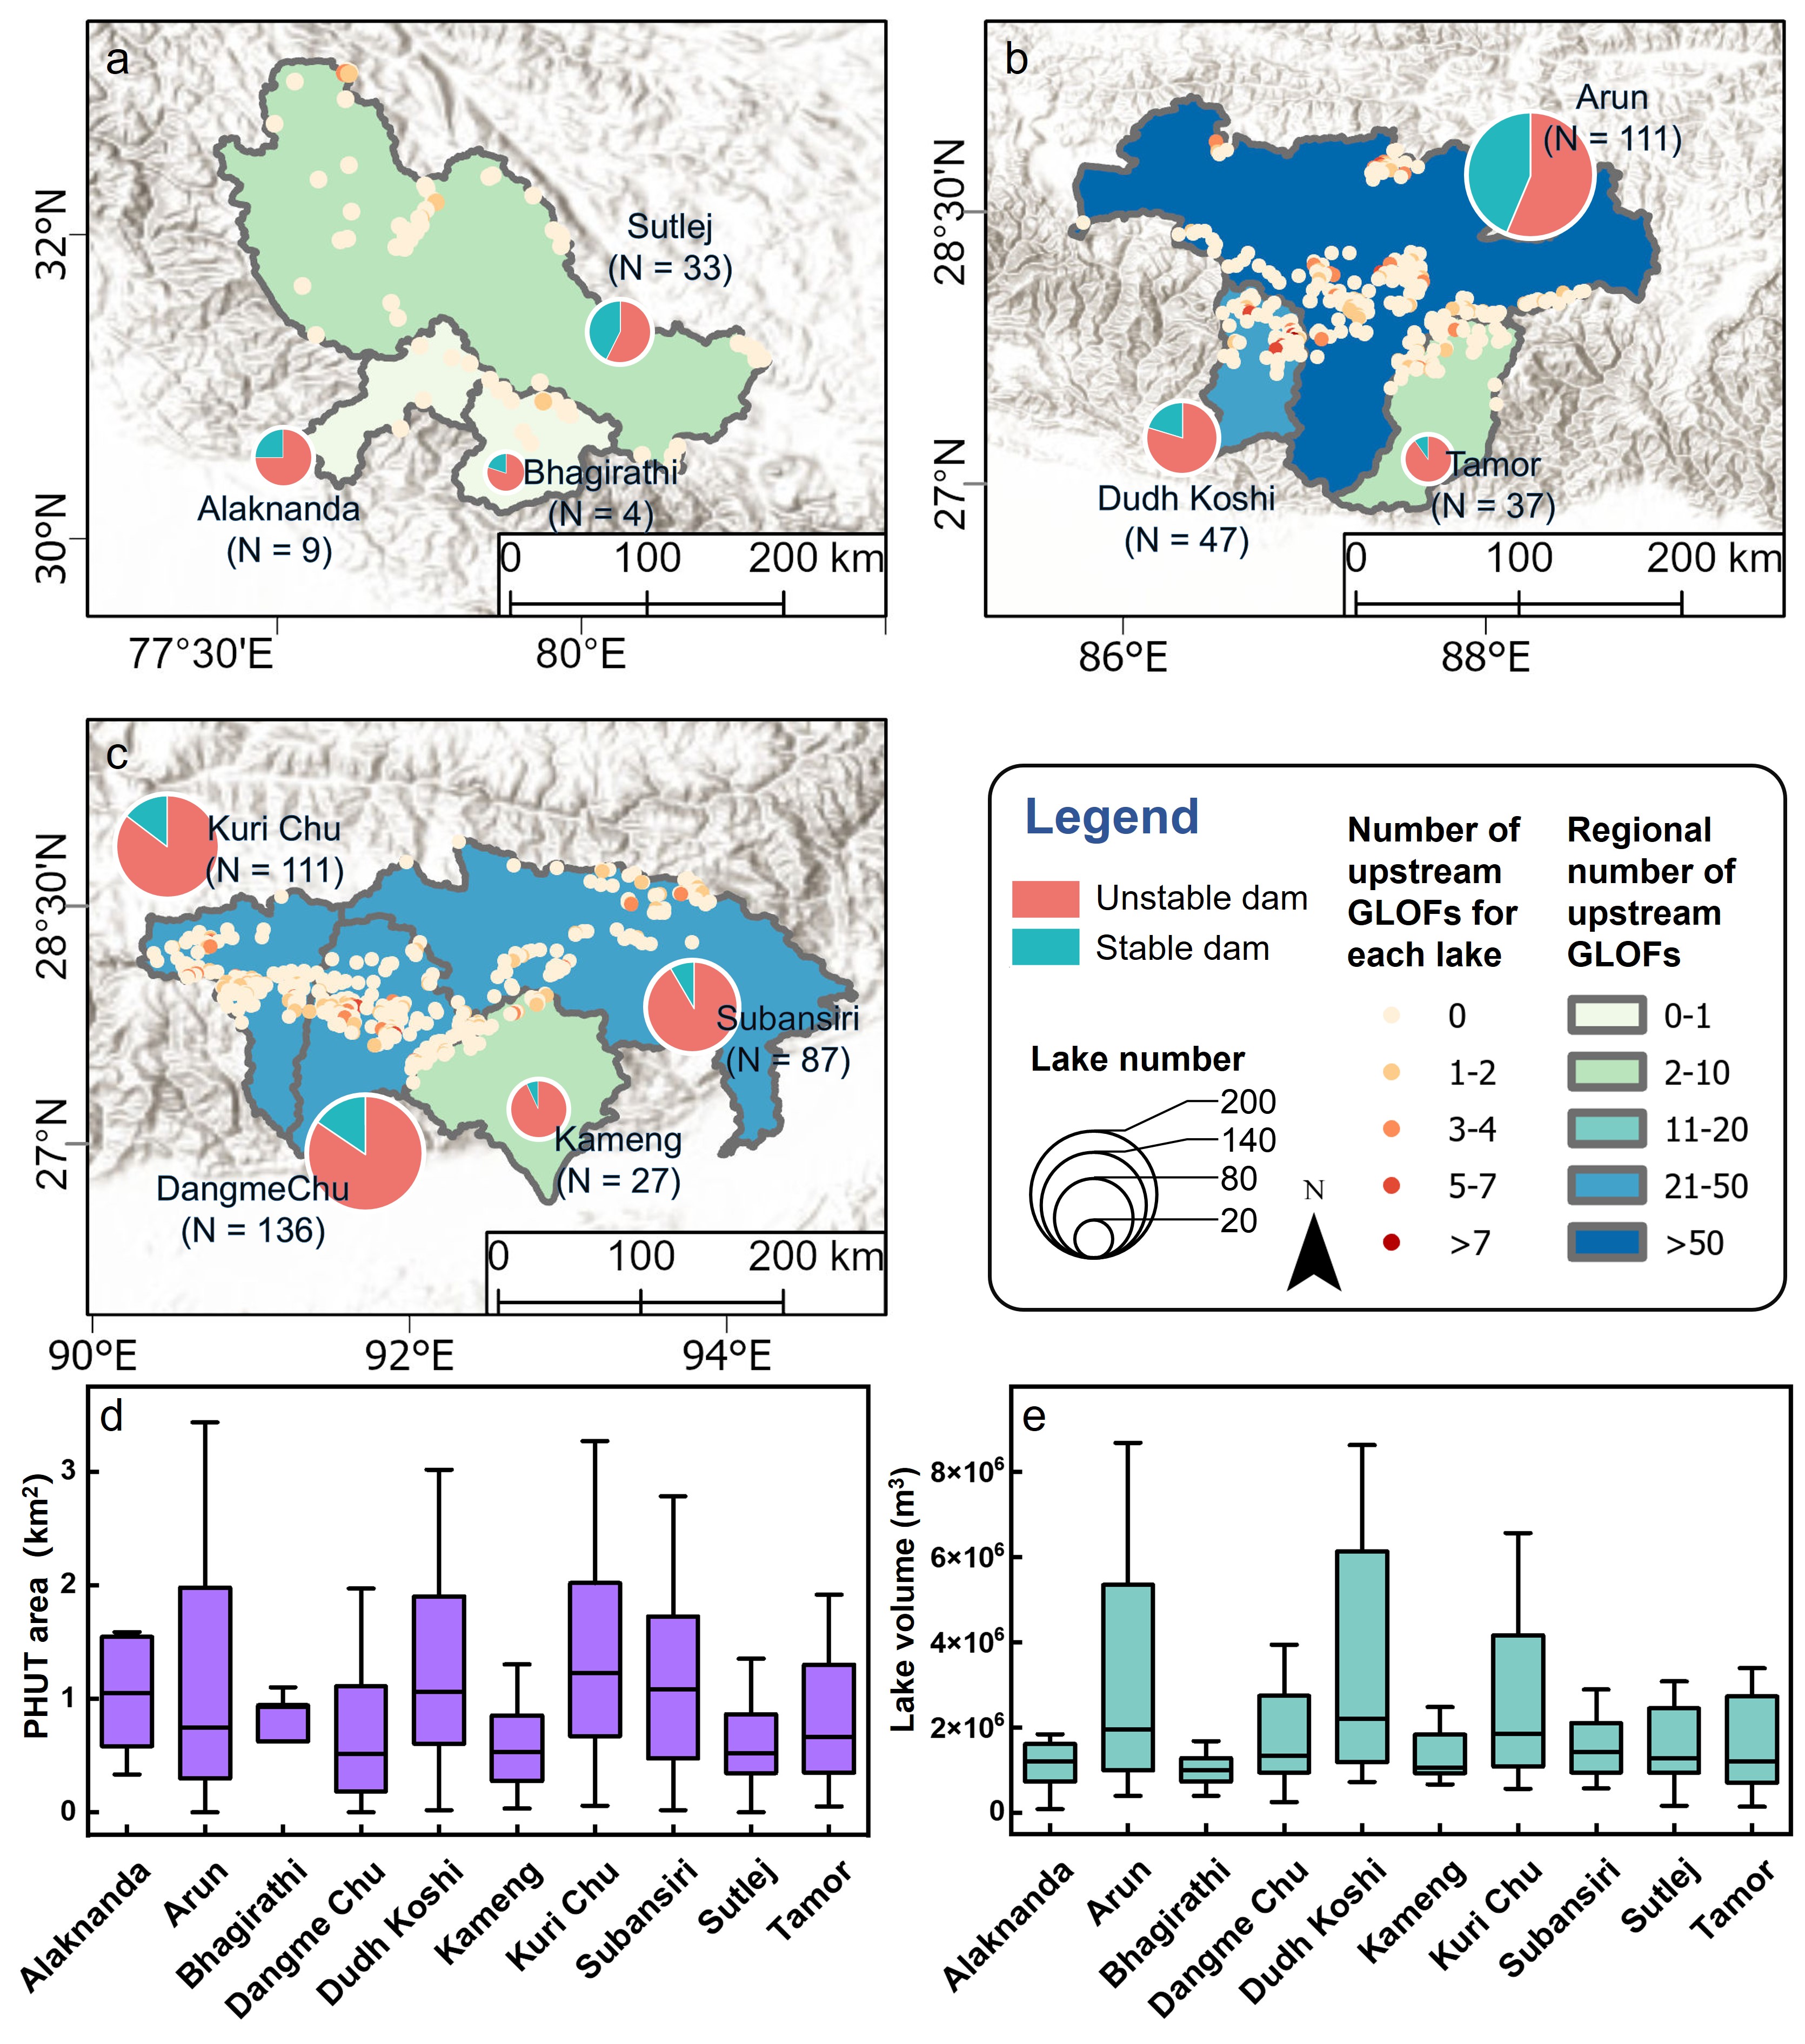


**Supplementary Figure 9 | Statistics and distribution of factors controlling GLOF hazard levels. a-c** Stability of lake dams and number of upstream GLOFs in ten sub-basins. **d** The distribution of PHUT area. **e** The volume distribution of glacial lakes is calculated using the area-volume empirical formula (see Methods).


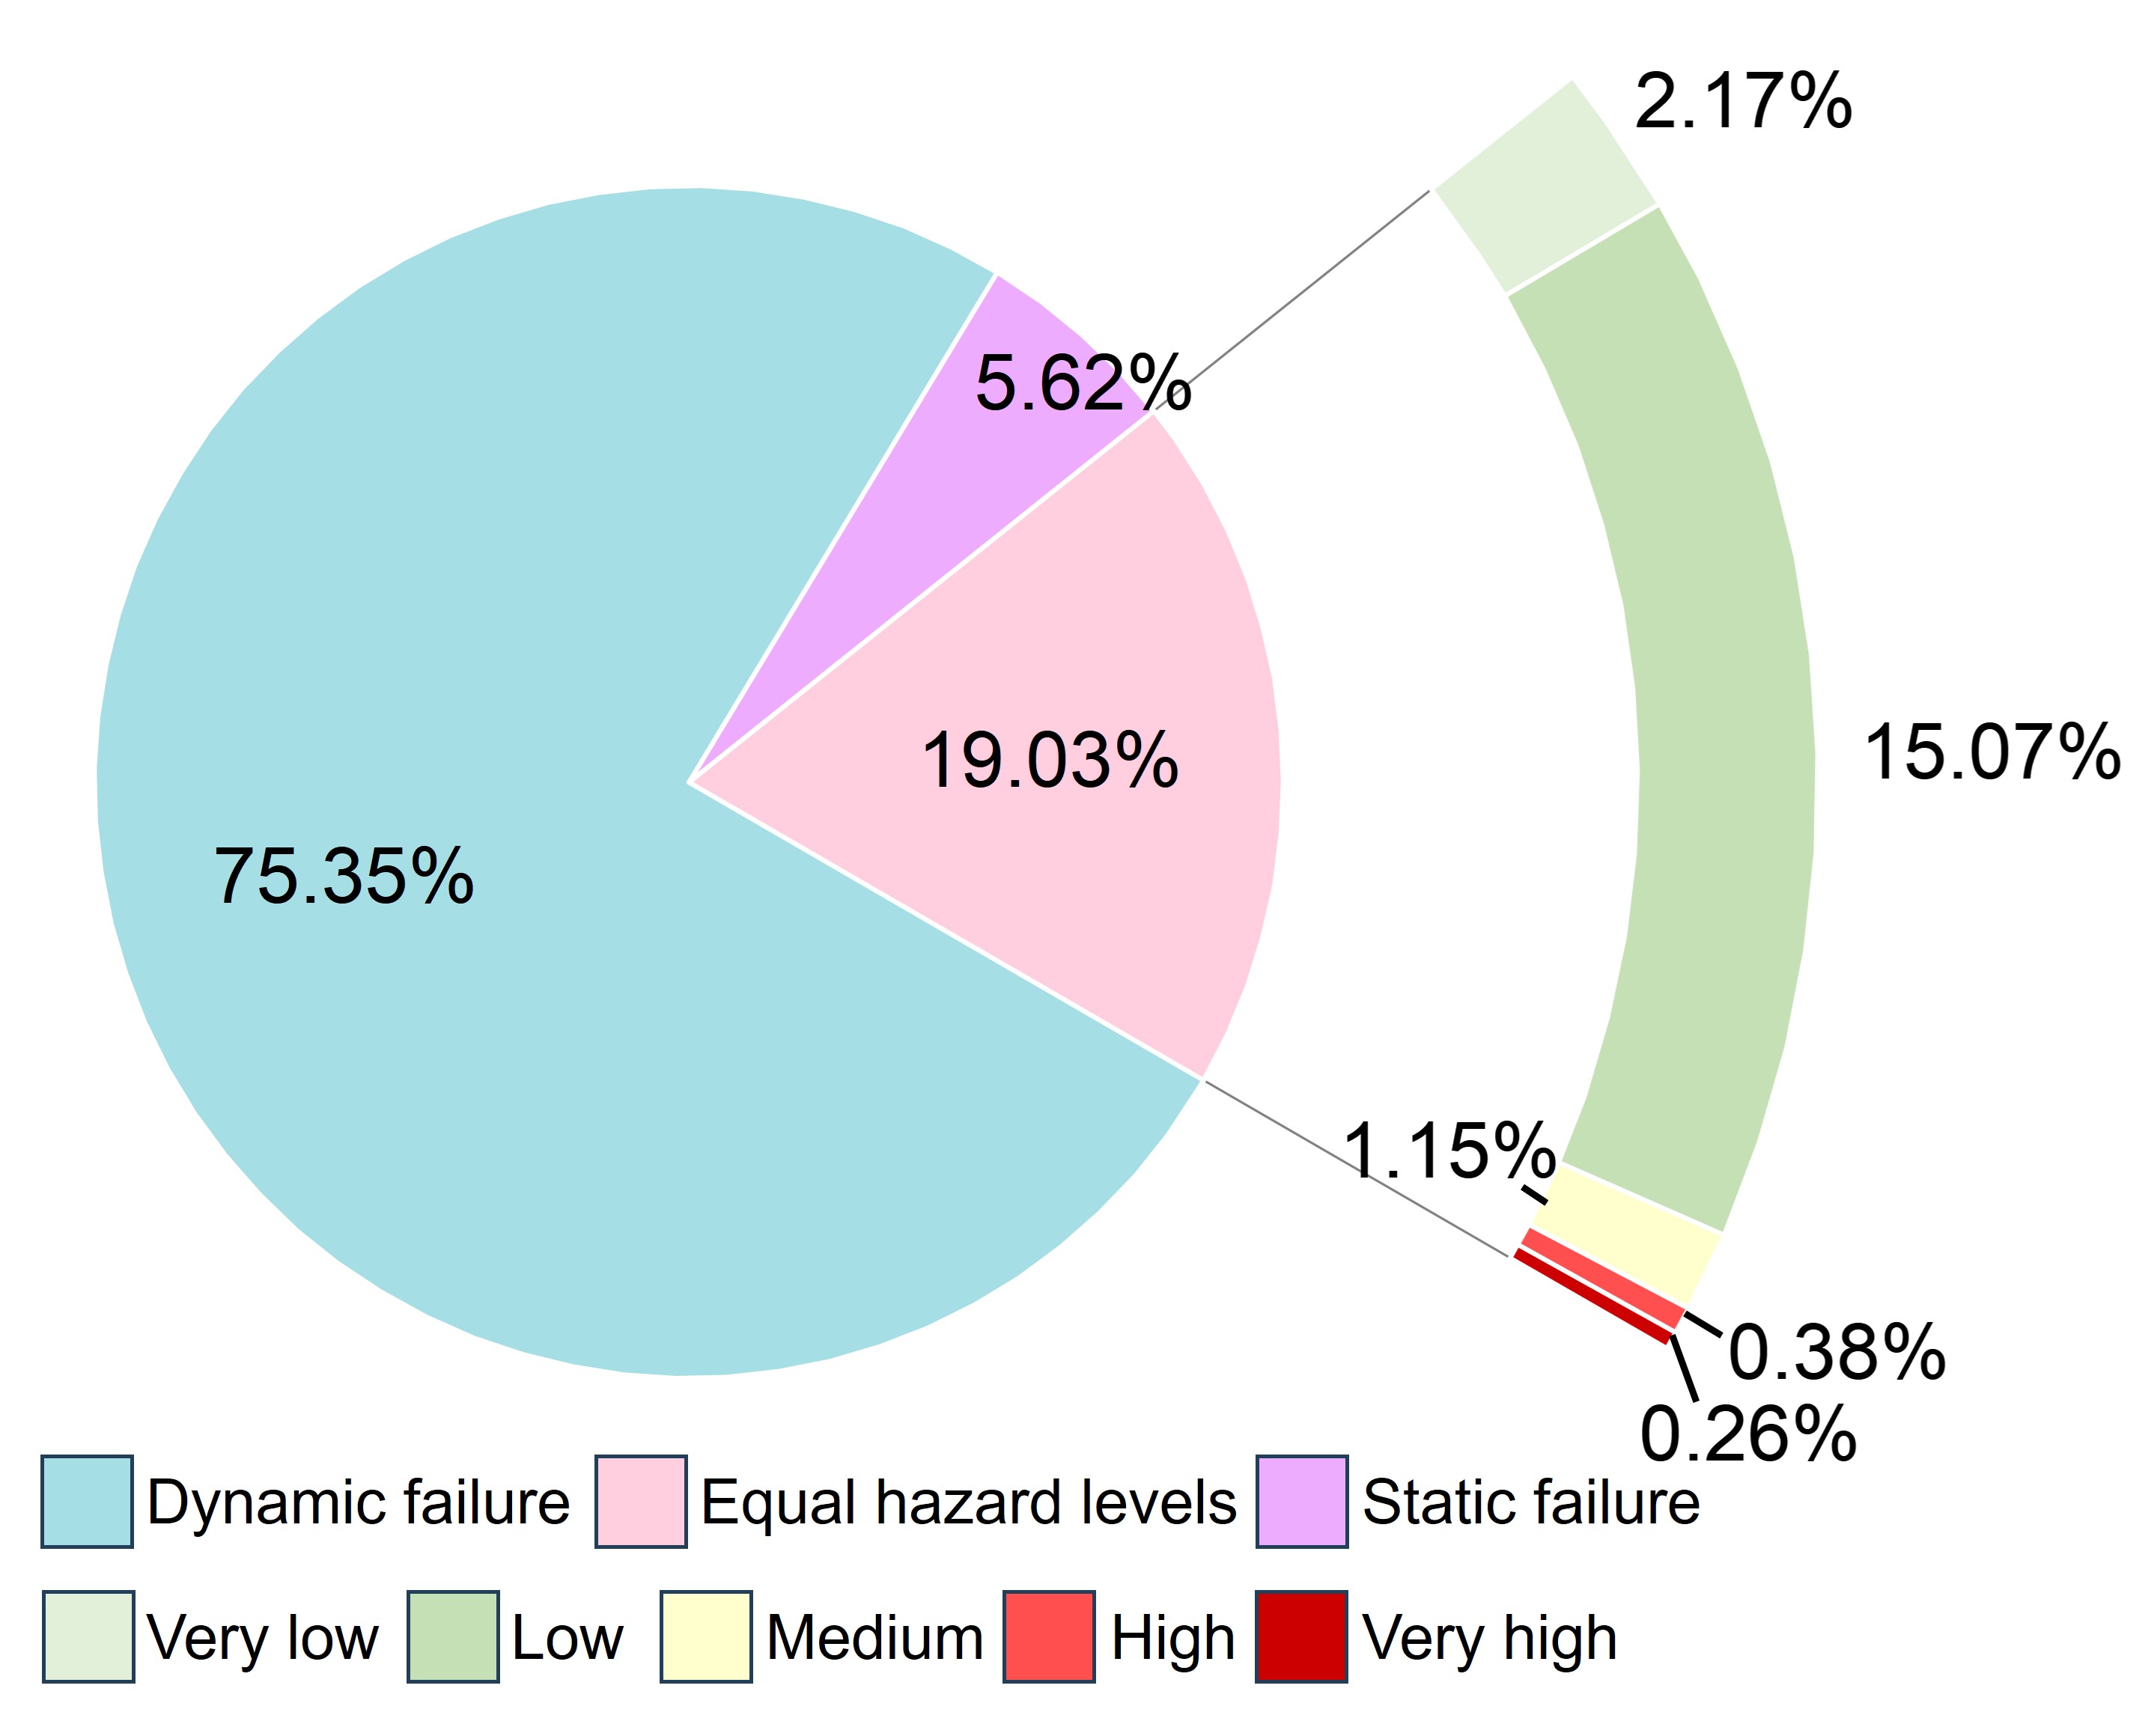


**Supplementary Figure 10 | Distribution of glacial lakes hazard levels based on dynamic and static failure modes.** The pie chart illustrates the proportion of hazard levels for all glacial lakes, determined by either dynamic failure or static failure modes. If the hazard level for dynamic failure is higher, it is assigned as the hazard level for the glacial lake, and vice versa.


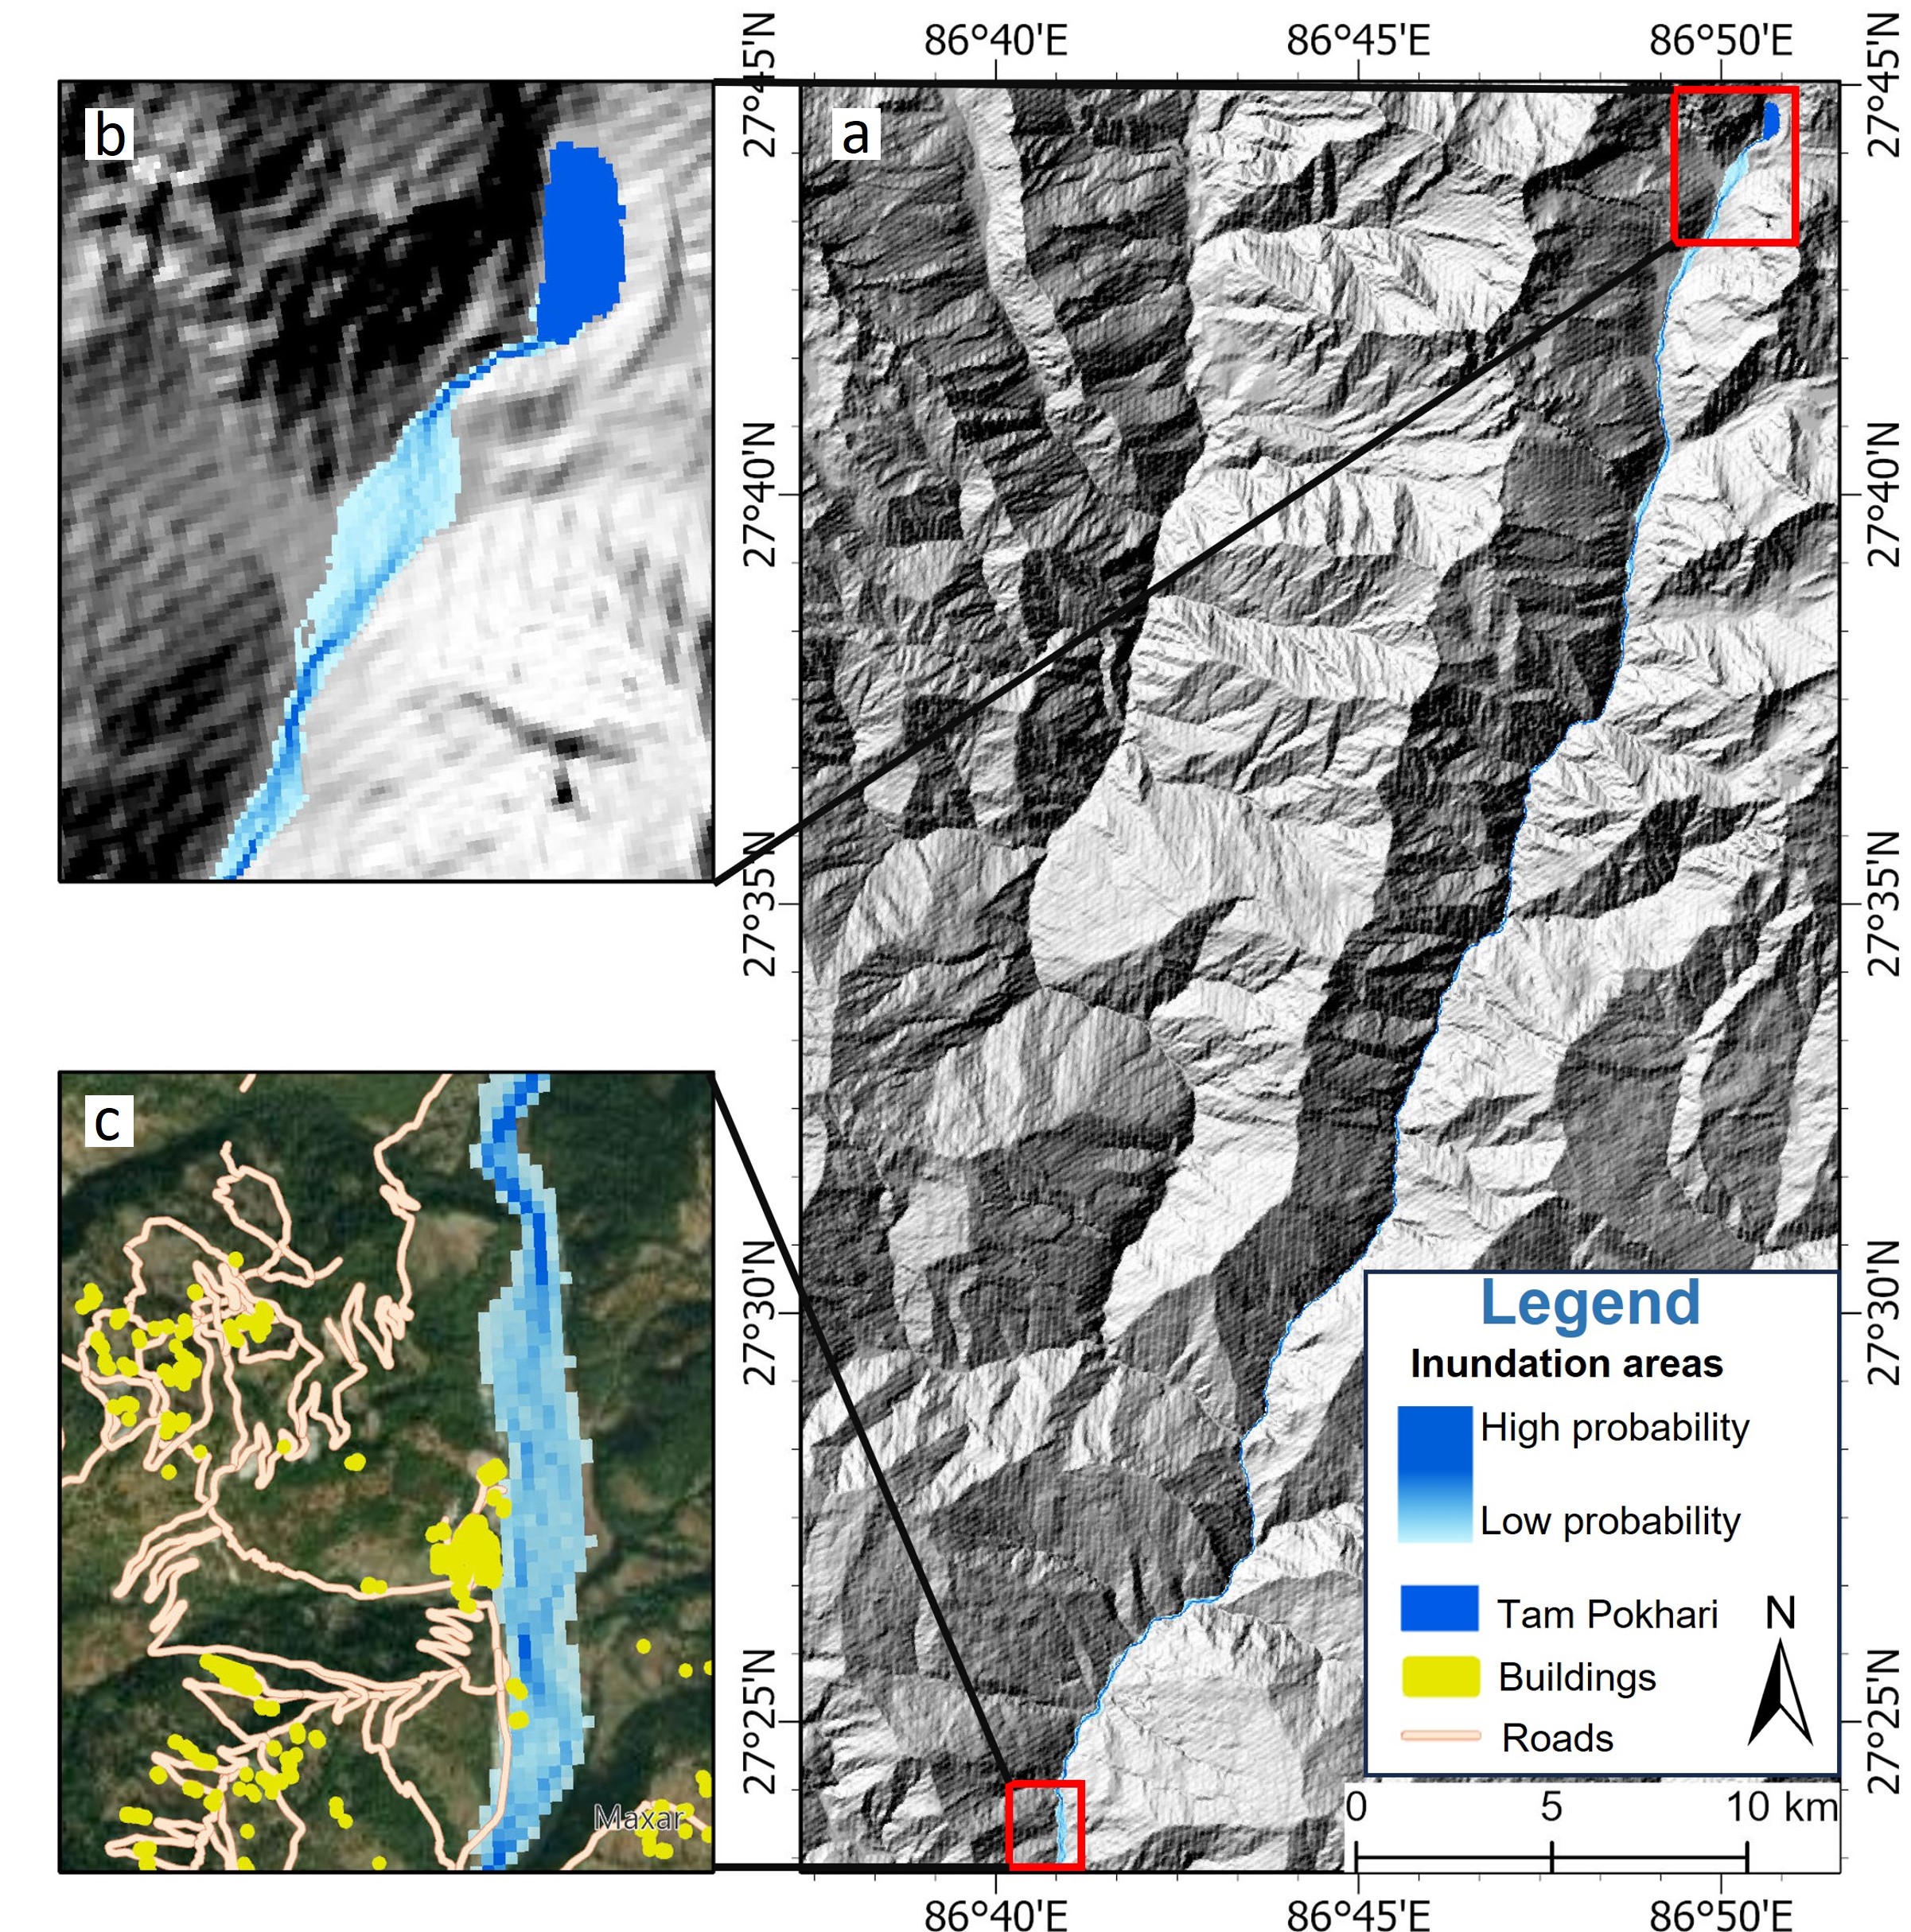


**Supplementary Figure 11 | The simulation results of the inundation area for Tam Pokhari Lake located in Dudh Koshi using the MC-LCP model.** **a** GLOF trajectory of Pokhari Lake under 50 km threshold. **b-c** Details of flood inundation, including downstream buildings and roads.


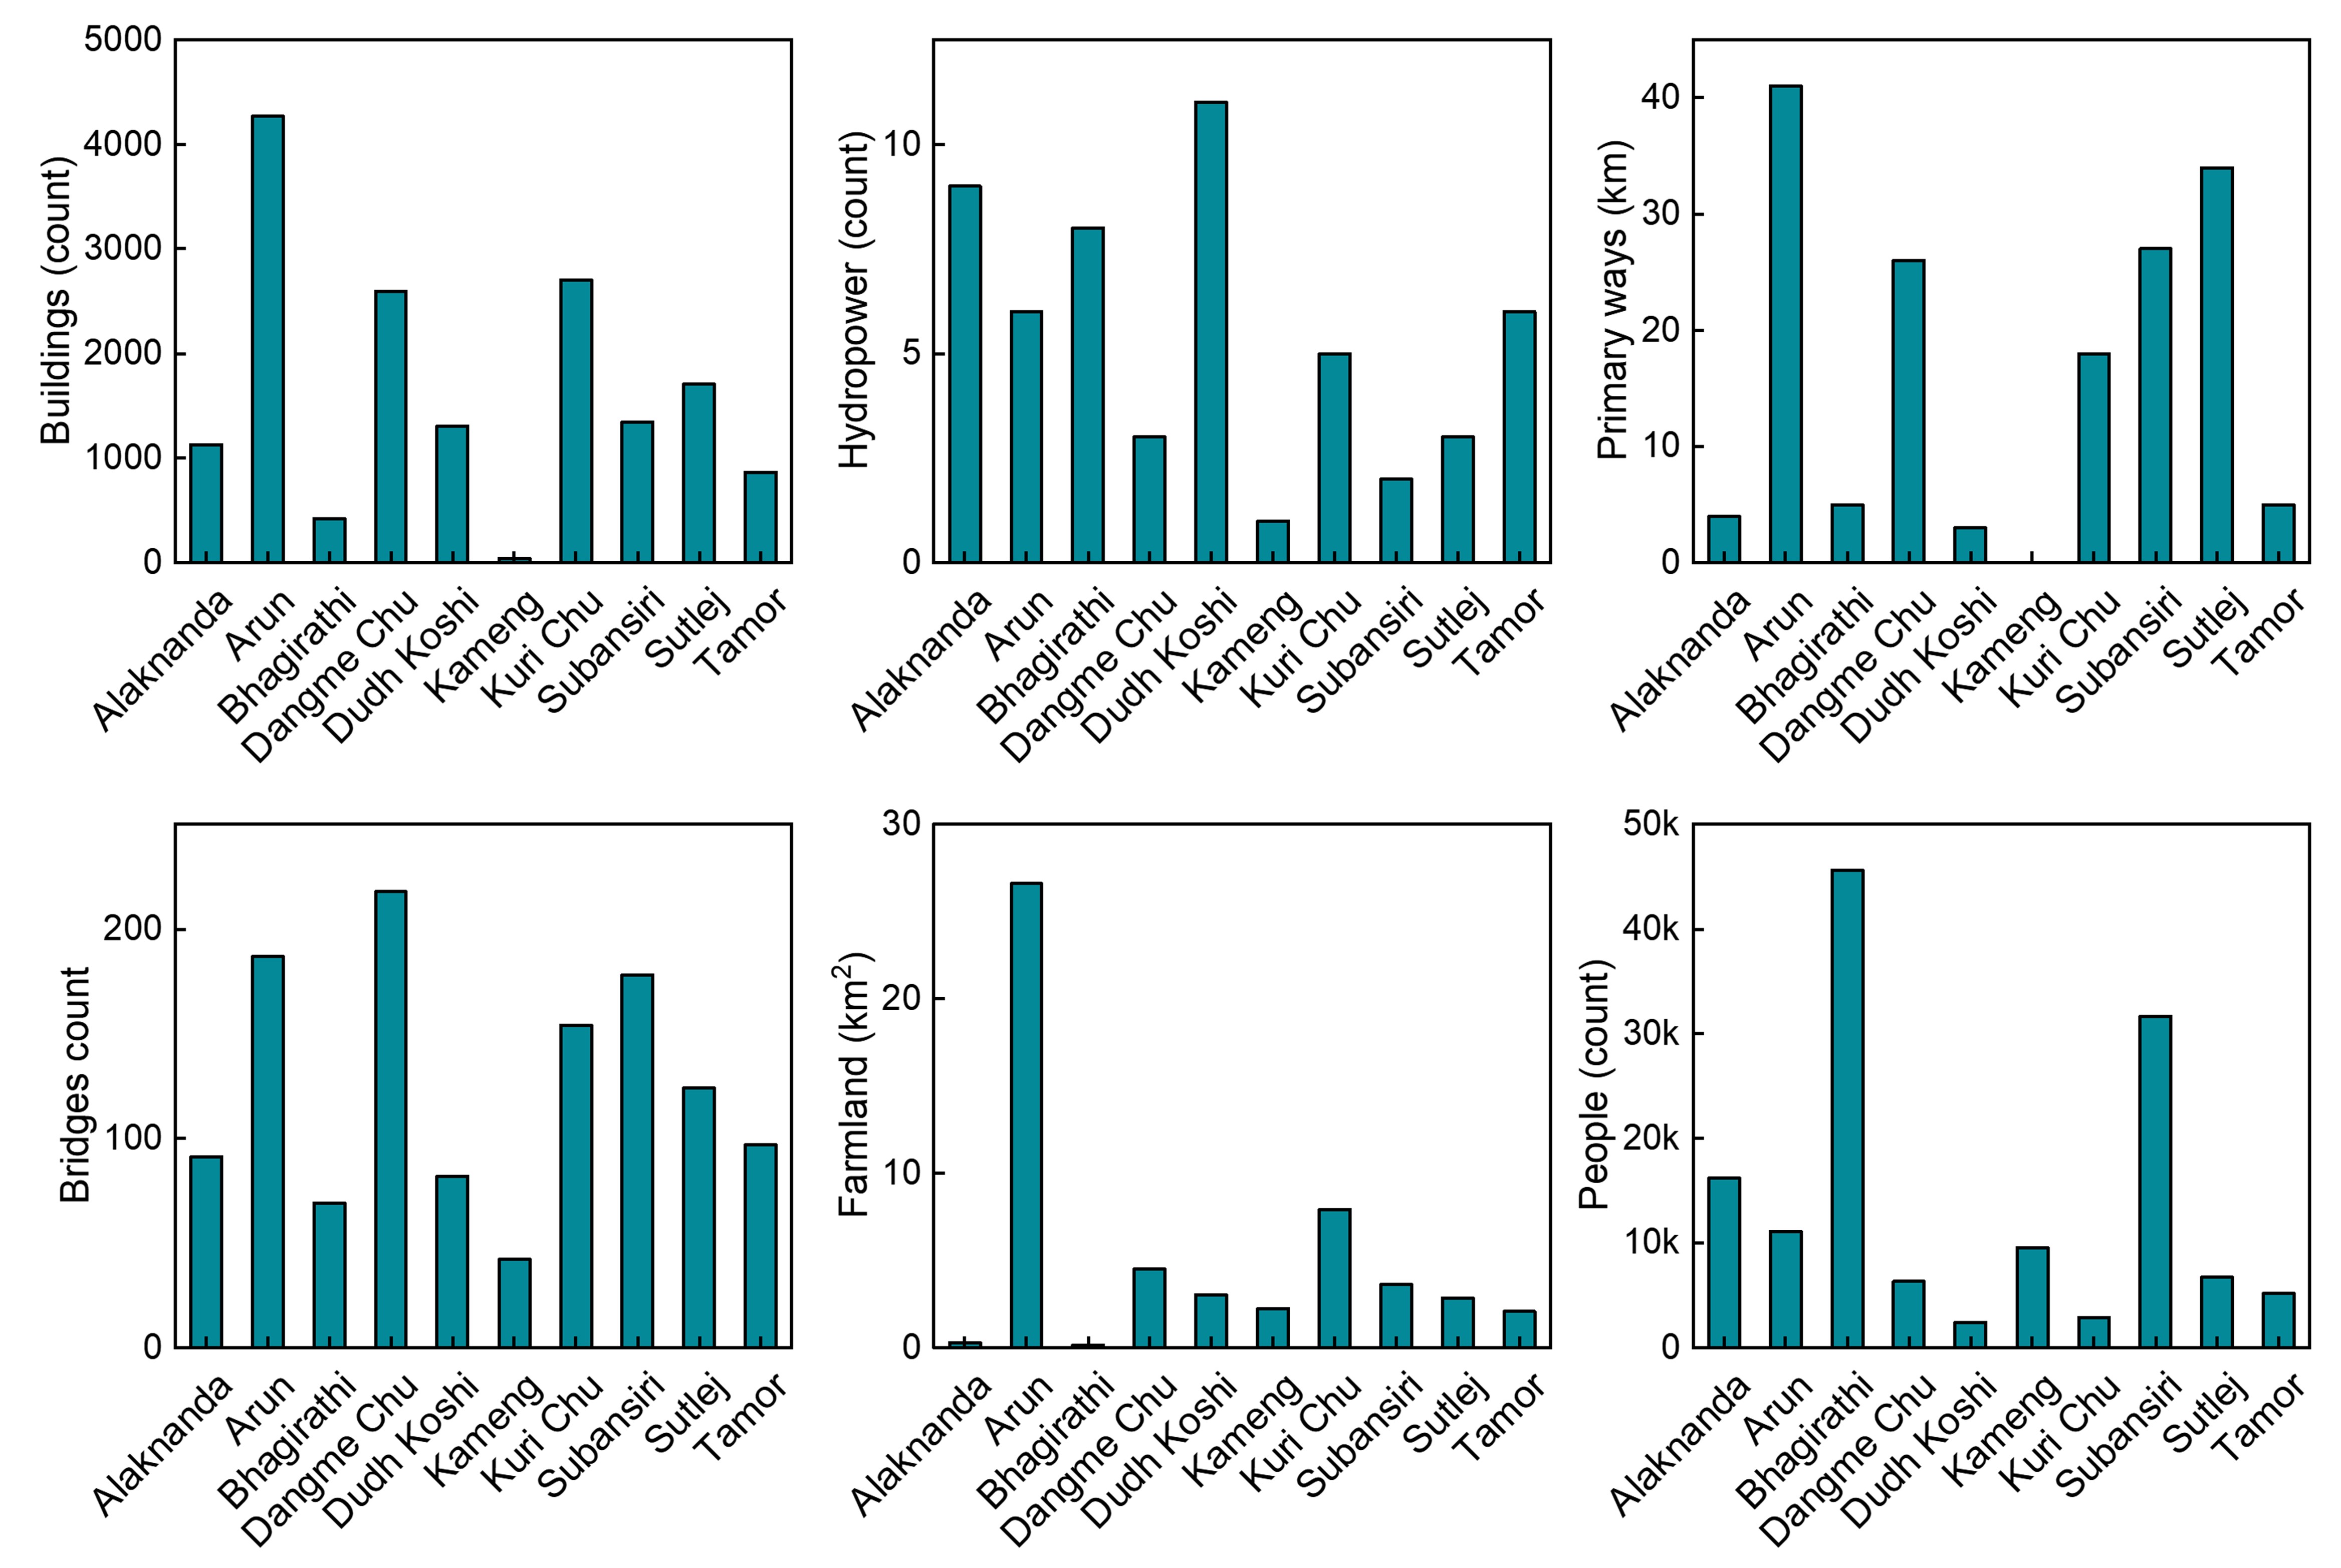


**Supplementary Figure 12 | Exposure statistics of downstream population and facilities in each sub-basin.**


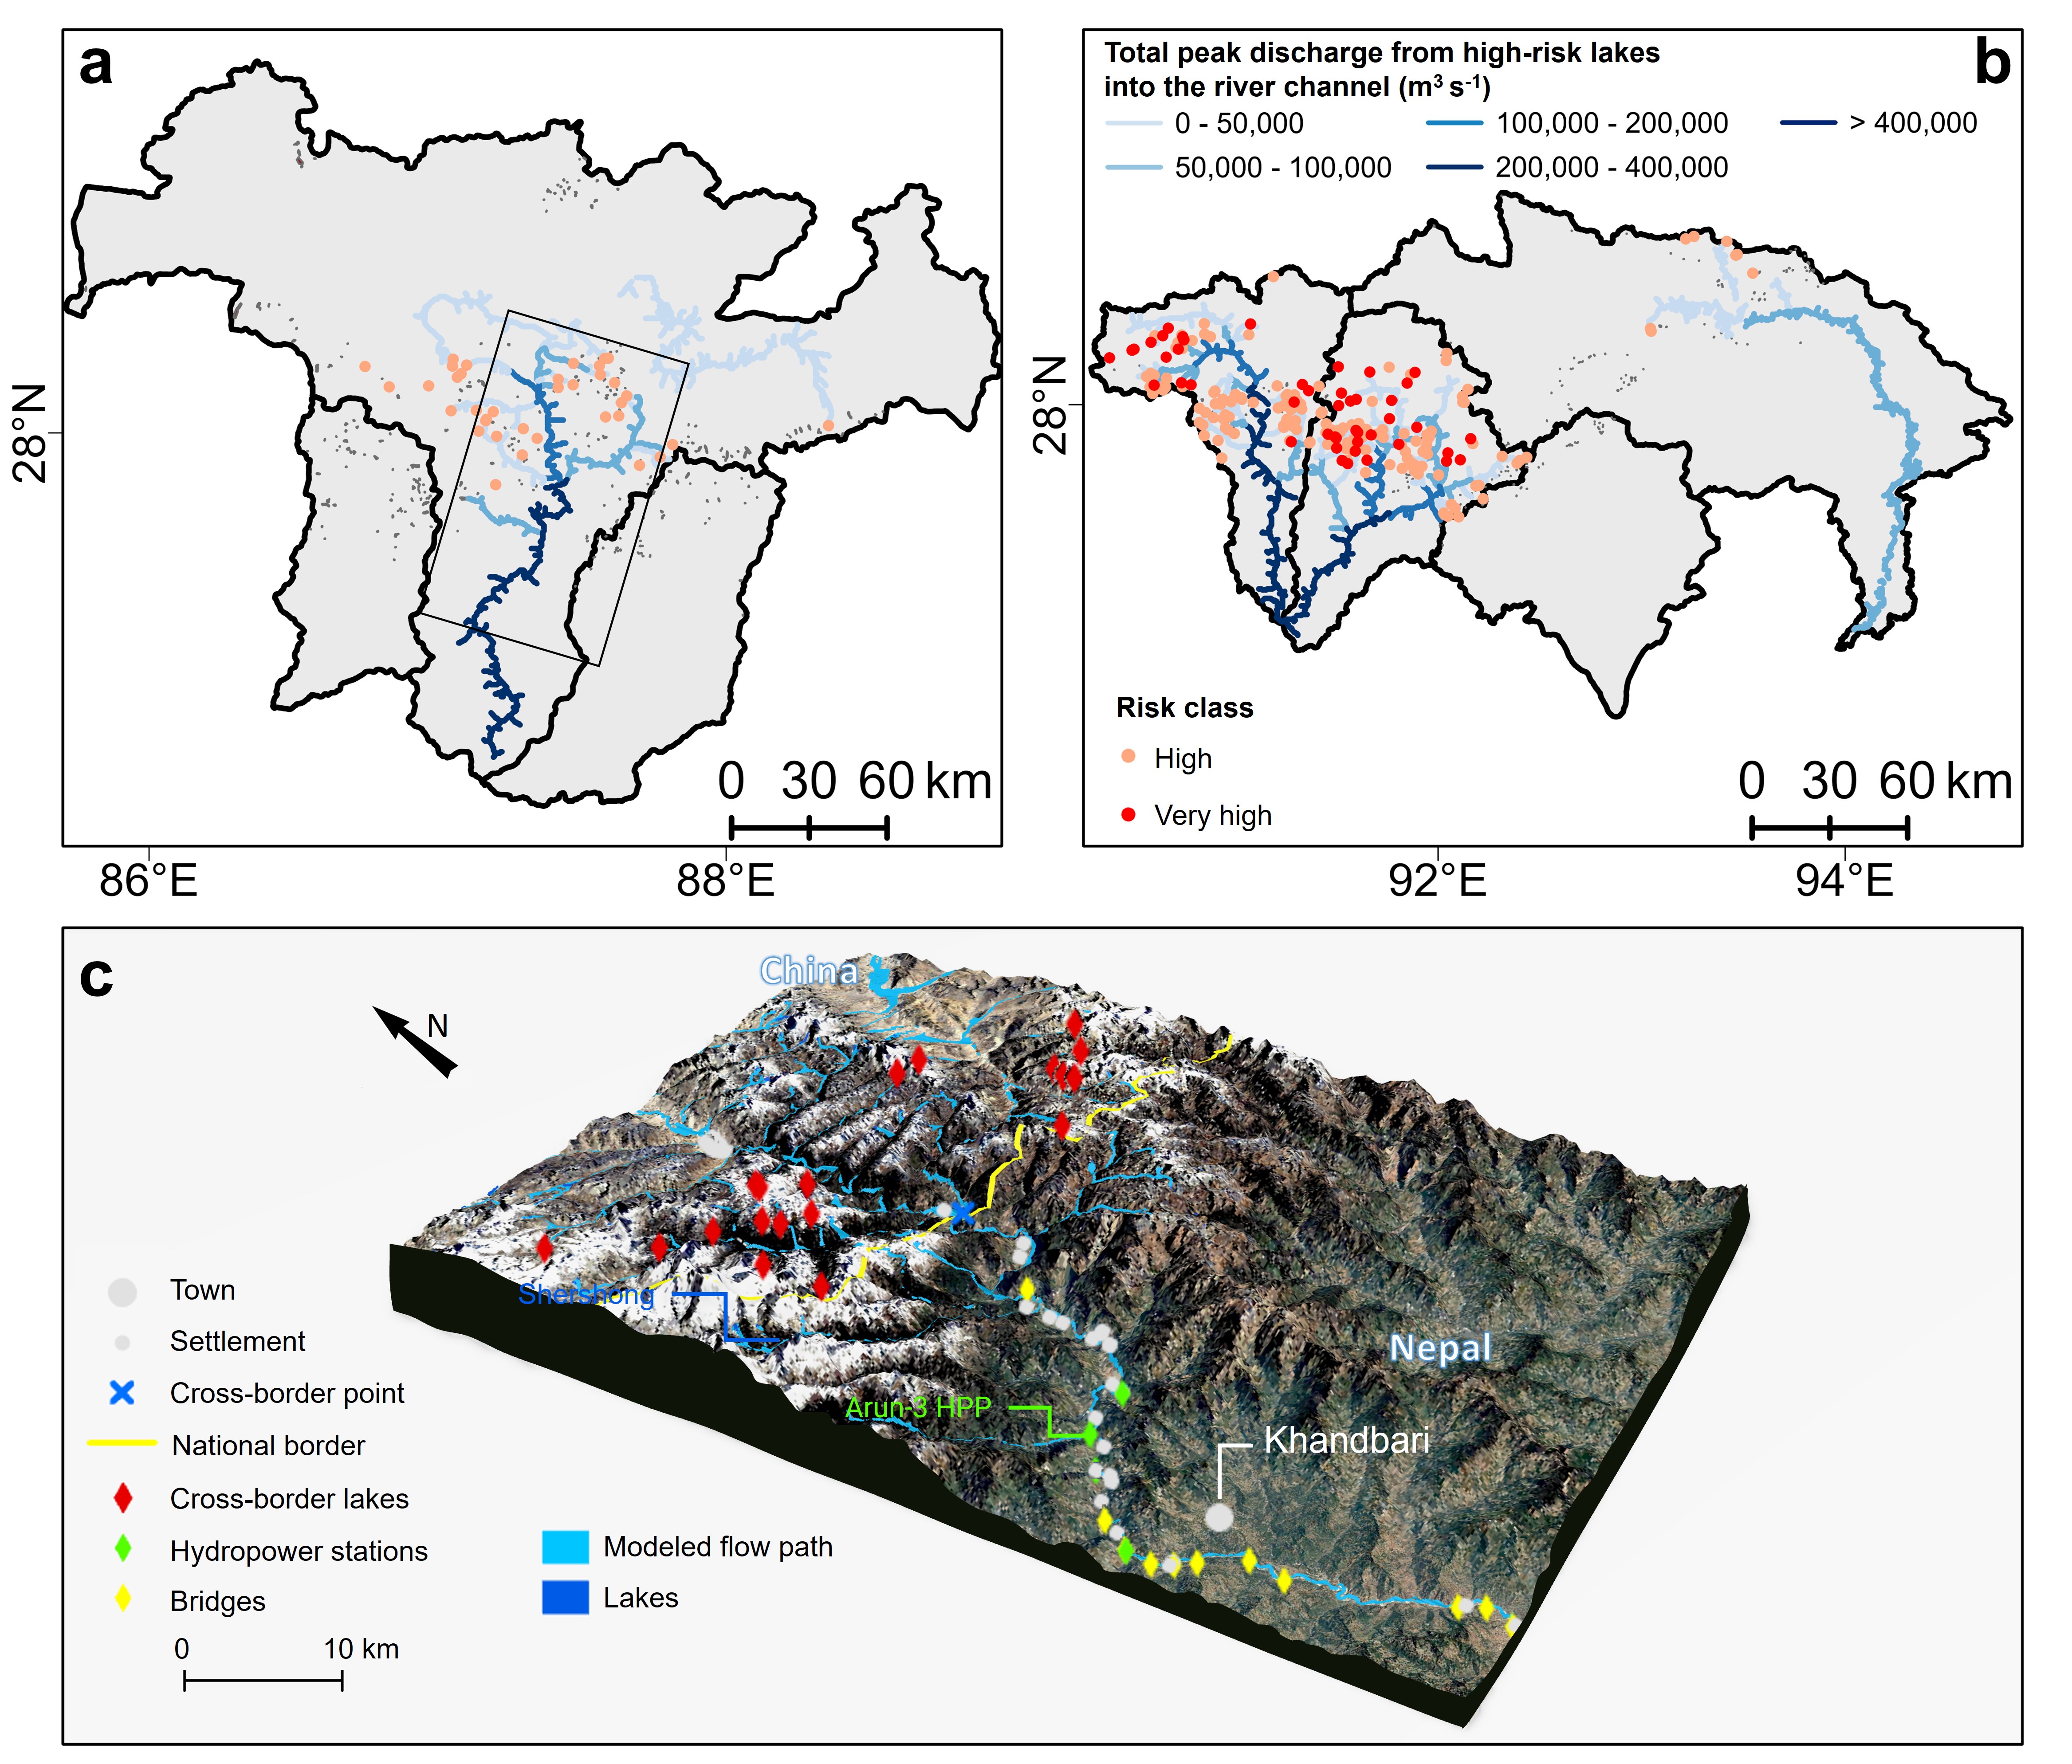


**Supplementary Figure 13 | Potential GLOF peek discharge from high-risk level into the river channel and 3D map depicting an example of the potential transboundary GLOF threats in Arun river. a-b** Potential GLOF peak discharge of each river channel within the sub-basin. **c** The cross-border area of Arun River. The base map uses Google imagery and annotates the villages, bridges, and hydropower stations around the river. Black box in **a** is the location of Arun river.

**Supplementary Table 1 | Summary of all data used for lake outburst flood susceptibility assessment, downstream hazard, exposure, vulnerability, and risk assessment.**

| ID | Data set | Source | Period | Spatial resolution (m) | Purpose |
| --- | --- | --- | --- | --- | --- |
| 1 | Sub-basin boundary | ICIMOD | April 2021 | - | Used to represent the boundary of the research area |
| 2 | Satellite imagery | Landsat 8 OLI | 2015-2020 | 30 | Used to depict the boundaries of glacial lakes |
| 3 | Elevation data | AW3D30 | April 2023 | 30 | Detecting terrain potential surrounding glacier lakes and simulate GLOF paths |
| 4 | Building data | Open Street Map | October 2023 | - | Quantify structures exposed to the simulated GLOFs |
| Population data | World Pop | 2020 | 100 | Statistics on downstream population exposure |
| 5 | Hydroelectric facilities | Global Energy Monitor | May 2023 | - | Statistical exposure of downstream hydropower facilities |
| Google Maps |  | - |
| 6 | Social census data | Global Data Lab | 2010-2023 | - | Calculating SVI as a proxy for glacial lake vulnerability |
| Humanitarian Data Exchange |
| 7 | GLOFs inventory | Shrestha, F. et al1 | 1950-2022 | - | Extracting GLOFs from the study area for model validation. |

**Supplementary Table 2 | 90 Glacier Lakes with significant expansion from 2015 to 2020. Type refers to the type of glacier lake.** Moraine-dammed lake (M), ice-dammed lake (I), bedrock-dammed lake (B), and others (O).

| **GL_id** | **Longitude**  **(°E)** | **Latitude**  **(°N)** | **Elevation** | **Type** | **Sub basin** | **lake area of 2015(km2)** | **lake area of 2020(km2)** | **lake area changes(km2)** | **change rate** |
| --- | --- | --- | --- | --- | --- | --- | --- | --- | --- |
| 3 | 78.1669 | 31.6605 | 4257 | M | Sutlej | 0.212±0.03 | 0.3±0.04 | 0.088±0.05 | 0.415±0.2 |
| 7 | 78.4456 | 33.0600 | 5690 | O | Sutlej | 0.07±0.01 | 0.095±0.02 | 0.025±0.02 | 0.358±0.27 |
| 8 | 78.4506 | 32.8875 | 5946 | B | Sutlej | 0.072±0.01 | 0.092±0.01 | 0.02±0.02 | 0.278±0.23 |
| 9 | 78.4546 | 33.0777 | 5820 | O | Sutlej | 0.057±0.02 | 0.088±0.02 | 0.03±0.02 | 0.529±0.34 |
| 11 | 78.4613 | 31.9720 | 5259 | M | Sutlej | 0.067±0.01 | 0.091±0.01 | 0.024±0.02 | 0.359±0.22 |
| 21 | 78.8402 | 31.9142 | 5583 | M | Sutlej | 0.181±0.02 | 0.218±0.02 | 0.037±0.03 | 0.201±0.15 |
| 26 | 78.9105 | 32.0180 | 5572 | B | Sutlej | 0.053±0.01 | 0.07±0.01 | 0.018±0.01 | 0.334±0.22 |
| 33 | 78.9775 | 32.1608 | 5575 | O | Sutlej | 0.079±0.01 | 0.105±0.01 | 0.027±0.02 | 0.339±0.17 |
| 35 | 78.9850 | 32.3004 | 5698 | M | Sutlej | 0.085±0.01 | 0.111±0.01 | 0.026±0.02 | 0.312±0.18 |
| 46 | 79.6187 | 30.6986 | 4164 | O | Alaknanda | 0.093±0.01 | 0.121±0.02 | 0.027±0.02 | 0.293±0.2 |
| 48 | 79.6828 | 32.2542 | 5609 | O | Sutlej | 0.052±0.01 | 0.082±0.01 | 0.03±0.01 | 0.572±0.22 |
| 49 | 79.7298 | 31.0284 | 5332 | M | Sutlej | 0.051±0.01 | 0.076±0.01 | 0.025±0.02 | 0.495±0.25 |
| 57 | 79.8942 | 30.8301 | 5196 | M | Alaknanda | 0.057±0.01 | 0.089±0.01 | 0.032±0.02 | 0.554±0.24 |
| 62 | 80.5980 | 30.5448 | 5501 | M | Sutlej | 0.064±0.01 | 0.084±0.01 | 0.019±0.02 | 0.302±0.21 |
| 66 | 81.1368 | 31.2339 | 5561 | M | Sutlej | 0.092±0.02 | 0.114±0.02 | 0.023±0.02 | 0.249±0.22 |
| 70 | 81.1595 | 31.2173 | 5598 | M | Sutlej | 0.066±0.01 | 0.091±0.01 | 0.025±0.02 | 0.382±0.25 |
| 203 | 87.3036 | 27.9381 | 4588 | O | Arun | 0.083±0.01 | 0.109±0.01 | 0.026±0.02 | 0.311±0.21 |
| 206 | 87.3417 | 27.8364 | 4243 | I | Arun | 0.174±0.02 | 0.228±0.02 | 0.053±0.03 | 0.307±0.16 |
| 231 | 87.4778 | 27.9967 | 4480 | O | Arun | 0.077±0.01 | 0.093±0.01 | 0.017±0.02 | 0.219±0.19 |
| 239 | 87.4920 | 28.8382 | 5453 | O | Arun | 0.053±0.01 | 0.085±0.01 | 0.031±0.02 | 0.581±0.25 |
| 250 | 87.5342 | 28.6942 | 5159 | O | Arun | 0.527±0.03 | 0.586±0.03 | 0.06±0.05 | 0.113±0.08 |
| 253 | 87.5536 | 28.7733 | 5316 | O | Arun | 0.225±0.02 | 0.265±0.02 | 0.04±0.03 | 0.177±0.12 |
| 267 | 87.5827 | 28.0488 | 4715 | M | Arun | 0.063±0.01 | 0.09±0.01 | 0.026±0.02 | 0.417±0.28 |
| 284 | 87.6211 | 28.2504 | 5842 | M | Arun | 0.07±0.01 | 0.089±0.01 | 0.019±0.02 | 0.275±0.21 |
| 298 | 87.6363 | 28.0929 | 5177 | M | Arun | 0.769±0.05 | 0.868±0.05 | 0.099±0.08 | 0.128±0.09 |
| 305 | 87.7020 | 27.8864 | 5193 | I | Arun | 0.074±0.01 | 0.144±0.02 | 0.071±0.02 | 0.963±0.19 |
| 340 | 87.9627 | 27.8462 | 5216 | M | Tamor | 0.077±0.01 | 0.11±0.01 | 0.033±0.02 | 0.423±0.2 |
| 347 | 88.0418 | 27.9426 | 5815 | M | Arun | 0.104±0.01 | 0.13±0.01 | 0.025±0.02 | 0.241±0.17 |
| 352 | 88.0658 | 27.9318 | 5562 | M | Arun | 0.959±0.06 | 1.095±0.06 | 0.136±0.08 | 0.142±0.08 |
| 353 | 88.0767 | 27.9446 | 5488 | M | Arun | 1.461±0.07 | 1.707±0.07 | 0.246±0.1 | 0.168±0.06 |
| 358 | 88.2420 | 28.0033 | 5269 | M | Arun | 0.42±0.04 | 0.485±0.04 | 0.064±0.05 | 0.153±0.12 |
| 369 | 90.3845 | 28.2044 | 5424 | M | Kuri Chu | 0.359±0.03 | 0.418±0.03 | 0.059±0.05 | 0.164±0.12 |
| 370 | 90.4085 | 28.1514 | 4847 | I | Kuri Chu | 0.084±0.04 | 0.137±0.03 | 0.054±0.05 | 0.639±0.49 |
| 388 | 90.6630 | 28.2075 | 5071 | M | Kuri Chu | 0.057±0.01 | 0.081±0.01 | 0.023±0.01 | 0.405±0.21 |
| 398 | 90.7434 | 28.0787 | 5166 | M | Kuri Chu | 0.165±0.02 | 0.211±0.02 | 0.046±0.03 | 0.281±0.14 |
| 403 | 90.8171 | 27.9885 | 4911 | O | Kuri Chu | 0.091±0.02 | 0.16±0.02 | 0.069±0.03 | 0.754±0.3 |
| 405 | 90.8277 | 27.9222 | 4616 | I | Kuri Chu | 0.053±0.01 | 0.08±0.01 | 0.027±0.02 | 0.501±0.24 |
| 406 | 90.8402 | 28.0223 | 4984 | M | Kuri Chu | 0.125±0.02 | 0.22±0.02 | 0.095±0.03 | 0.761±0.21 |
| 409 | 90.8503 | 27.8656 | 4594 | O | Kuri Chu | 0.095±0.02 | 0.126±0.02 | 0.031±0.02 | 0.324±0.2 |
| 417 | 90.8977 | 28.0533 | 4770 | M | Kuri Chu | 0.071±0.01 | 0.101±0.01 | 0.03±0.02 | 0.416±0.23 |
| 433 | 90.9659 | 27.9221 | 4520 | I | Kuri Chu | 0.063±0.01 | 0.088±0.01 | 0.025±0.02 | 0.405±0.26 |
| 435 | 90.9696 | 27.9075 | 4411 | O | Kuri Chu | 0.058±0.01 | 0.077±0.01 | 0.019±0.02 | 0.334±0.27 |
| 437 | 90.9785 | 28.0071 | 4401 | O | Kuri Chu | 0.093±0.01 | 0.11±0.01 | 0.018±0.02 | 0.194±0.18 |
| 443 | 90.9991 | 27.8744 | 4197 | O | Kuri Chu | 0.106±0.01 | 0.134±0.01 | 0.028±0.02 | 0.262±0.17 |
| 444 | 91.0041 | 28.0343 | 4206 | O | Kuri Chu | 0.755±0.06 | 0.935±0.07 | 0.179±0.09 | 0.237±0.1 |
| 445 | 91.0030 | 28.0445 | 4078 | O | Kuri Chu | 0.09±0.02 | 0.12±0.02 | 0.031±0.03 | 0.341±0.28 |
| 446 | 91.0132 | 27.8770 | 4173 | O | Kuri Chu | 0.114±0.02 | 0.138±0.01 | 0.024±0.02 | 0.208±0.17 |
| 448 | 91.0321 | 28.0312 | 4318 | O | Kuri Chu | 0.054±0.01 | 0.076±0.01 | 0.023±0.02 | 0.42±0.24 |
| 461 | 91.2088 | 28.0819 | 4267 | O | Kuri Chu | 0.06±0.01 | 0.082±0.01 | 0.023±0.02 | 0.377±0.26 |
| 463 | 91.2333 | 27.9677 | 4564 | O | Kuri Chu | 0.051±0.01 | 0.079±0.01 | 0.028±0.02 | 0.555±0.26 |
| 466 | 91.2426 | 27.9096 | 4385 | O | Kuri Chu | 0.16±0.02 | 0.297±0.03 | 0.137±0.03 | 0.858±0.14 |
| 479 | 91.2761 | 27.8920 | 4721 | O | Kuri Chu | 0.09±0.01 | 0.109±0.01 | 0.019±0.02 | 0.208±0.18 |
| 480 | 91.2776 | 27.9784 | 4421 | O | Kuri Chu | 0.068±0.01 | 0.093±0.01 | 0.025±0.02 | 0.371±0.23 |
| 490 | 91.3171 | 27.9904 | 4765 | M | Kuri Chu | 0.056±0.01 | 0.071±0.01 | 0.014±0.01 | 0.254±0.22 |
| 493 | 91.3338 | 28.0879 | 5145 | M | Kuri Chu | 0.05±0.01 | 0.066±0.01 | 0.016±0.01 | 0.323±0.25 |
| 499 | 91.4299 | 27.9673 | 4821 | O | Kuri Chu | 0.062±0.01 | 0.078±0.01 | 0.016±0.01 | 0.266±0.21 |
| 500 | 91.4486 | 27.8791 | 4242 | O | Dangme Chu | 0.096±0.01 | 0.127±0.01 | 0.031±0.02 | 0.327±0.18 |
| 505 | 91.4800 | 27.8892 | 4259 | O | Dangme Chu | 0.065±0.01 | 0.084±0.01 | 0.018±0.02 | 0.283±0.22 |
| 528 | 91.5894 | 27.8058 | 4413 | O | Dangme Chu | 0.121±0.01 | 0.144±0.01 | 0.022±0.02 | 0.185±0.16 |
| 529 | 91.5921 | 27.7968 | 4080 | O | Dangme Chu | 0.158±0.02 | 0.239±0.03 | 0.081±0.03 | 0.515±0.16 |
| 531 | 91.5960 | 27.8876 | 4640 | O | Dangme Chu | 0.166±0.02 | 0.206±0.02 | 0.04±0.03 | 0.242±0.15 |
| 537 | 91.6106 | 27.9179 | 4636 | O | Dangme Chu | 0.081±0.01 | 0.101±0.01 | 0.02±0.02 | 0.245±0.2 |
| 540 | 91.6283 | 27.8610 | 4640 | O | Dangme Chu | 0.081±0.01 | 0.106±0.01 | 0.025±0.02 | 0.308±0.21 |
| 544 | 91.6417 | 27.9015 | 4986 | O | Dangme Chu | 0.052±0.01 | 0.075±0.01 | 0.023±0.01 | 0.444±0.23 |
| 552 | 91.6759 | 28.0136 | 4425 | O | Dangme Chu | 0.128±0.01 | 0.151±0.02 | 0.023±0.02 | 0.181±0.16 |
| 562 | 91.7840 | 27.6207 | 3967 | O | Dangme Chu | 0.065±0.01 | 0.091±0.01 | 0.026±0.02 | 0.409±0.27 |
| 563 | 91.8033 | 27.6246 | 4328 | O | Dangme Chu | 0.087±0.01 | 0.112±0.01 | 0.025±0.02 | 0.286±0.17 |
| 571 | 91.8472 | 28.0943 | 5161 | M | Dangme Chu | 0.059±0.01 | 0.081±0.01 | 0.022±0.02 | 0.365±0.24 |
| 576 | 91.8642 | 28.1321 | 5404 | M | Dangme Chu | 0.071±0.01 | 0.095±0.01 | 0.024±0.02 | 0.336±0.26 |
| 608 | 92.0156 | 27.5081 | 4160 | O | Dangme Chu | 0.069±0.01 | 0.1±0.01 | 0.03±0.02 | 0.438±0.21 |
| 614 | 92.0394 | 28.1929 | 5034 | O | Dangme Chu | 0.222±0.02 | 0.308±0.02 | 0.086±0.03 | 0.385±0.11 |
| 616 | 92.0419 | 28.2301 | 5105 | O | Dangme Chu | 0.159±0.02 | 0.227±0.02 | 0.068±0.03 | 0.425±0.18 |
| 621 | 92.0628 | 28.2699 | 5037 | M | Subansiri | 0.056±0.01 | 0.077±0.01 | 0.02±0.02 | 0.359±0.25 |
| 626 | 92.1094 | 27.6054 | 4426 | O | Dangme Chu | 0.058±0.01 | 0.085±0.01 | 0.027±0.01 | 0.459±0.2 |
| 632 | 92.1353 | 27.5503 | 4609 | O | Dangme Chu | 0.056±0.01 | 0.077±0.01 | 0.021±0.02 | 0.377±0.23 |
| 658 | 92.3411 | 27.7293 | 4972 | O | Dangme Chu | 0.06±0.01 | 0.085±0.01 | 0.025±0.02 | 0.423±0.26 |
| 660 | 92.3449 | 27.7094 | 4908 | O | Dangme Chu | 0.065±0.01 | 0.082±0.01 | 0.018±0.02 | 0.273±0.24 |
| 672 | 92.4357 | 27.7702 | 5176 | M | Dangme Chu | 0.583±0.05 | 0.667±0.04 | 0.085±0.07 | 0.146±0.11 |
| 685 | 92.6410 | 28.0010 | 5267 | M | Subansiri | 0.095±0.02 | 0.119±0.01 | 0.024±0.02 | 0.255±0.21 |
| 690 | 92.6579 | 27.8235 | 4278 | O | Kameng | 0.071±0.01 | 0.194±0.02 | 0.123±0.02 | 1.738±0.19 |
| 710 | 92.8536 | 27.9440 | 4041 | O | Kameng | 0.052±0.01 | 0.07±0.01 | 0.018±0.01 | 0.356±0.25 |
| 715 | 92.9003 | 28.0698 | 4292 | O | Subansiri | 0.084±0.02 | 0.121±0.02 | 0.037±0.02 | 0.444±0.23 |
| 718 | 92.9265 | 28.7430 | 5083 | O | Subansiri | 0.068±0.01 | 0.085±0.01 | 0.017±0.01 | 0.252±0.2 |
| 725 | 93.0086 | 28.1547 | 4299 | O | Subansiri | 0.063±0.01 | 0.095±0.01 | 0.032±0.02 | 0.509±0.21 |
| 748 | 93.4381 | 28.3021 | 3956 | O | Subansiri | 0.33±0.03 | 0.494±0.04 | 0.164±0.05 | 0.497±0.13 |
| 755 | 93.5452 | 28.5652 | 4490 | I | Subansiri | 0.06±0.01 | 0.082±0.01 | 0.022±0.02 | 0.359±0.23 |
| 770 | 93.7568 | 28.6763 | 4181 | I | Subansiri | 0.06±0.01 | 0.08±0.01 | 0.02±0.02 | 0.331±0.24 |
| 772 | 93.8024 | 28.6472 | 3999 | I | Subansiri | 0.054±0.01 | 0.07±0.01 | 0.017±0.01 | 0.312±0.24 |
| 777 | 93.8256 | 28.5803 | 4216 | O | Subansiri | 0.083±0.01 | 0.107±0.02 | 0.025±0.02 | 0.297±0.23 |
| 781 | 93.8456 | 28.5855 | 4230 | O | Subansiri | 0.067±0.01 | 0.088±0.01 | 0.02±0.02 | 0.304±0.23 |
| Tatoal | - | - | - | - | - | 13.162±0.19 | 16.923±0.20 | 3.760±0.78 | 0.335±0.02 |

|  |
| --- |

**Supplementary Table 3 | 25 Glacier Lakes with significant reduction from 2015 to 2020.**

| **GL_id** | **Longitude**  **(°E)** | **Latitude**  **(°N)** | **Elevation** | **Type** | **Sub basin** | **lake area of 2015(km2)** | **lake area of 2020(km2)** | **lake area changes(km2)** | **change rate** |
| --- | --- | --- | --- | --- | --- | --- | --- | --- | --- |
| 1 | 32.7317 | 77.9812 | 4964 | O | Sutlej | 0.102 ± 0.01 | 0.022 ± 0.0 | -0.08 ± 0.01 | -0.786 ± 0.22 |
| 34 | 32.3197 | 78.9791 | 5498 | M | Sutlej | 0.108 ± 0.01 | 0.078 ± 0.01 | -0.03 ± 0.02 | -0.278 ± 0.21 |
| 52 | 32.0295 | 79.8126 | 5609 | M | Sutlej | 0.053 ± 0.02 | 0.027 ± 0.01 | -0.026 ± 0.02 | -0.486 ± 0.41 |
| 16 | 31.5535 | 78.7510 | 5268 | M | Sutlej | 0.113 ± 0.01 | 0.053 ± 0.01 | -0.06 ± 0.02 | -0.53 ± 0.22 |
| 44 | 30.9803 | 79.4871 | 5656 | M | Alaknanda | 0.054 ± 0.01 | 0.014 ± 0.0 | -0.04 ± 0.01 | -0.747 ± 0.27 |
| 767 | 28.5944 | 93.7257 | 4201 | B | Subansiri | 0.24 ± 0.02 | 0.206 ± 0.02 | -0.034 ± 0.03 | -0.141 ± 0.12 |
| 760 | 28.5755 | 93.5782 | 3844 | O | Subansiri | 0.375 ± 0.03 | 0.326 ± 0.03 | -0.049 ± 0.04 | -0.131 ± 0.12 |
| 727 | 28.3199 | 93.0467 | 4255 | M | Subansiri | 0.697 ± 0.05 | 0.631 ± 0.04 | -0.066 ± 0.06 | -0.095 ± 0.1 |
| 742 | 28.3131 | 93.3914 | 4072 | O | Subansiri | 0.189 ± 0.02 | 0.157 ± 0.01 | -0.031 ± 0.02 | -0.166 ± 0.13 |
| 747 | 28.2977 | 93.4190 | 3820 | O | Subansiri | 0.186 ± 0.03 | 0.104 ± 0.02 | -0.082 ± 0.03 | -0.442 ± 0.21 |
| 394 | 28.2737 | 90.7362 | 4510 | M | Kuri Chu | 1.733 ± 0.09 | 1.582 ± 0.09 | -0.151 ± 0.13 | -0.087 ± 0.08 |
| 395 | 28.0967 | 90.7383 | 5006 | M | Kuri Chu | 0.728 ± 0.05 | 0.619 ± 0.05 | -0.109 ± 0.07 | -0.15 ± 0.11 |
| 367 | 28.0568 | 88.5172 | 5570 | M | Arun | 0.123 ± 0.02 | 0.072 ± 0.01 | -0.051 ± 0.02 | -0.414 ± 0.23 |
| 356 | 27.9946 | 88.2118 | 5231 | M | Arun | 0.055 ± 0.01 | 0.041 ± 0.01 | -0.014 ± 0.01 | -0.26 ± 0.25 |
| 256 | 27.9799 | 87.5570 | 4773 | O | Arun | 0.097 ± 0.01 | 0.078 ± 0.01 | -0.02 ± 0.02 | -0.203 ± 0.18 |
| 334 | 27.9431 | 87.8969 | 5493 | M | Arun | 0.137 ± 0.02 | 0.055 ± 0.01 | -0.081 ± 0.02 | -0.595 ± 0.2 |
| 558 | 27.9398 | 91.7600 | 4507 | O | Dangme Chu | 0.074 ± 0.01 | 0.059 ± 0.01 | -0.015 ± 0.01 | -0.206 ± 0.22 |
| 487 | 27.9207 | 91.3012 | 4554 | O | Kuri Chu | 0.078 ± 0.01 | 0.06 ± 0.01 | -0.018 ± 0.01 | -0.227 ± 0.2 |
| 488 | 27.8928 | 91.3052 | 4050 | O | Kuri Chu | 0.271 ± 0.03 | 0.193 ± 0.02 | -0.078 ± 0.04 | -0.287 ± 0.16 |
| 535 | 27.8784 | 91.6043 | 4444 | O | Dangme Chu | 0.058 ± 0.01 | 0.029 ± 0.01 | -0.029 ± 0.01 | -0.495 ± 0.31 |
| 530 | 27.8151 | 91.5943 | 4681 | O | Dangme Chu | 0.151 ± 0.02 | 0.069 ± 0.01 | -0.083 ± 0.03 | -0.548 ± 0.22 |
| 351 | 27.7839 | 88.0655 | 4813 | I | Tamor | 0.071 ± 0.01 | 0.019 ± 0.0 | -0.051 ± 0.01 | -0.727 ± 0.26 |
| 577 | 27.7456 | 91.8703 | 4339 | O | Dangme Chu | 0.44 ± 0.03 | 0.398 ± 0.03 | -0.043 ± 0.04 | -0.097 ± 0.09 |
| 243 | 27.6811 | 87.5177 | 4471 | O | Arun | 0.115 ± 0.02 | 0.092 ± 0.01 | -0.024 ± 0.02 | -0.206 ± 0.2 |
| 248 | 27.5815 | 87.5322 | 4289 | O | Tamor | 0.095 ± 0.02 | 0.053 ± 0.01 | -0.042 ± 0.02 | -0.444 ± 0.23 |
| Total | - | - | - | - | - | 6.341 ± 0.15 | 5.035 ± 0.12 | -1.306 ± 0.19 | -8.747 ± 1.06 |

**Supplementary Table 4 | Hazard levels of 23 historical GLOFs events within the study under the same evaluation** **method.**

| **Lake ID** | **Lake name** | **GLOF date** | **GLOF driver** | **Latitude (°N)** | **Longitude (°E)** | **Sub**  **basin** | **Volume normalization index** | **PHUT normalization index** | **Hazard** |
| --- | --- | --- | --- | --- | --- | --- | --- | --- | --- |
| 324 | Gelhaip Co | September 21, 1964 | Ice avalanche | 27.964 | 87.816 | Arun | 0.834 | 0.868 | Very High |
| 78 | Aya Co | August 15th, 1968  August 17th, 1968  August 18th, 1968 | Ice avalanche | 28.346 | 86.49 | Arun | 0.791 | 0.547 | Middle |
| 327 | Nagma Pokhari | June 23, 1980 | Unknown | 27.869 | 87.867 | Tamor | 0.869 | 0.933 | Very High |
| 382 | Zari Co | June 24, 1981 | Ice avalanche | 28.2995 | 90.6072 | Kuri Chu | 0.801 | 0.547 | High |
| 335 | Jin Co/Yindapu Co | August 27, 1982 | Ice avalanche | 27.951 | 87.908 | Arun | 0.862 | 0.881 | Very High |
| 123 | Sabai Tsho/ Tam Pokhari | September 3rd, 1998 | Ice avalanche | 27.742 | 86.845 | Dudh Koshi | 0.766 | 0.978 | Very High |
| 564 | Lang Co | August 10th, 2007 | Unknown | 27.828 | 91.807 | Dangme Chu | 0.568 | 0.724 | Very High |
| 343 | Geiqu | 2010 | Intense rainfall | 27.951215 | 87.98544 | Arun | 0.569 | 0.761 | Very High |
| 335 | Jin Co/Yindapu Co | 2015 | Unknown | 27.951 | 87.908 | Arun | 0.862 | 0.881 | Very High |
| 174 | Langmale | April 20, 2017 | Rockfall | 27.814 | 87.141 | Arun | 0.520 | 0.733 | Very High |
| 151 | Unnamed | - | Unknown | 27.799 | 86.966 | Dudh Koshi | 0.765 | 0.595 | Very High |
| 166 | Barun | - | Unknown | 27.843 | 87.081 | Arun | 0.815 | 0.998 | Very High |
| 169 | Barun | - | Unknown | 27.829 | 87.094807 | Arun | 0.679 | 0.619 | High |
| 354 | Unnamed | - | Unknown | 27.8349 | 88.0787 | Tamor | 0.698 | 0.199 | Low |
| 372 | Unnamed | - | Unknown | 28.2419 | 90.5062 | Kuri Chu | 0.766 | 0.744 | Very High |
| 377 | Lure Co | - | Unknown | 28.27 | 90.59 | Kuri Chu | 0.851 | 0.935 | High |
| 379 | Unnamed | - | Ice avalanche | 28.06 | 90.605 | Kuri Chu | 0.839 | 0.460 | High |
| 390 | Dega Co | - | Unknown | 28.33357 | 90.673572 | Kuri Chu | 0.685 | 0.866 | Very High |
| 396 | Upper Shegong Co | - | Ice avalanche | 28.304 | 90.741 | Kuri Chu | 0.664 | 0.7503 | High |
| 651 | Unnamed | - | Unknown | 27.8922 | 92.3032 | Subansiri | 0.815 | 0.672 | High |
| 679 | Unnamed | - | Unknown | 27.9292 | 92.5352 | Subansiri | 0.599 | 0.686 | High |
| 685 | Unnamed | - | Unknown | 28.0013 | 92.6407 | Subansiri | 0.676 | 0.550 | High |
| 698 | Unnamed | - | Unknown | 28.2112 | 92.7491 | Subansiri | 0.626 | 0.633 | High |

**Supplementary Table 5 | Five social census indicators for downstream administrative regions, unit (%).**

| **Regin** | **County** | **Poor population** | **Illiterate** | **Population** | **Population** | **Rural population** | **SVI** |
| --- | --- | --- | --- | --- | --- | --- | --- |
| **Population** | **<15 yrs** | **>65 yrs** |
| Ngari Prefecture | China | 17.3 | 30.71 | 26.2 | 4.54 | 59.6 | 27.67 |
| Nyingchi | China | 16.42 | 22.21 | 20.6 | 5.05 | 57.7 | 24.396 |
| Shigatse | China | 10.7 | 32.75 | 26.3 | 5.61 | 75 | 30.072 |
| Shannan | China | - | 26.28 | 19.22 | 7.51 | 68.1 | 30.2775 |
| Koshi | Nepal | 26.6 | 14.35 | 28.7 | 8.26 | 35.5 | 22.682 |
| Madhesh | Nepal | 41.8 | 38.85 | 35.6 | 6.85 | 25.9 | 29.8 |
| Lhuentse | Bhutan | 65.5 | 34.6 | 29.5 | 15.8 | 84.2 | 45.92 |
| Monggar | Bhutan | 63.5 | 36.9 | 30.6 | 7.1 | 72.3 | 42.08 |
| Trashigang | Bhutan | 65.1 | 35.5 | 27.6 | 7.31 | 77.7 | 42.642 |
| Trashi Yangtse | Bhutan | 60.6 | 34.1 | 32.2 | 7.12 | 80.1 | 42.824 |
| Ladakh | India | 21.3 | 16.35 | 20 | 7 | 77.4 | 28.41 |
| Assam | India | 47.7 | 35.6 | 26.2 | 5.23 | 84.9 | 39.926 |
| Uttaranchal | India | 2.25 | 15.45 | 23.8 | 8.76 | 71.3 | 24.312 |
| Himachal Pradesh | India | 4.89 | 8.25 | 19.8 | 10.1 | 83.8 | 25.368 |

**Supplementary Table 6 | 58 glacial lakes defined as ‘high’ or ‘very high’ risk levels and their comparison with previous studies.** Purple data from Zheng et al.2 and orange data from Zhang et al.3

| **G_id** | **LAT** | **LON** | **ELEV** | **Sub_basin** | **Hazard** | **Exposure** | **Vulnerability** | **Risk** | **Risk** | **Risk** |
| --- | --- | --- | --- | --- | --- | --- | --- | --- | --- | --- |
| 113 | 28.20 | 86.75 | 5734 | Arun | High | Very high | Low | High | Medium |  |
| 152 | 28.15 | 86.97 | 5731 | Arun | High | Very high | Low | High | Medium |  |
| 157 | 28.07 | 87.05 | 5588 | Arun | High | Very high | Low | High | Medium | High |
| 161 | 28.17 | 87.07 | 5553 | Arun | High | Very high | Low | High | Low | Very low |
| 173 | 28.07 | 87.13 | 4878 | Arun | High | Very high | Low | High | High | Very low |
| 184 | 27.84 | 87.20 | 4002 | Arun | Very high | High | Low | High | Medium |  |
| 228 | 28.15 | 87.47 | 5105 | Arun | High | Very high | Low | High | Medium | Low |
| 229 | 28.21 | 87.47 | 4781 | Arun | Very high | Very high | Low | High |  | Very high |
| 259 | 28.18 | 87.56 | 5010 | Arun | Very high | Very high | Low | High | High | Low |
| 265 | 28.23 | 87.58 | 5247 | Arun | Very high | Very high | Low | High | Medium |  |
| 274 | 28.23 | 87.59 | 5410 | Arun | Very high | Very high | Low | High | High | Low |
| 291 | 28.05 | 87.63 | 5066 | Arun | Very high | High | Low | High | High | Medium |
| 298 | 28.09 | 87.64 | 5177 | Arun | Very high | High | Low | High | High | High |
| 304 | 27.90 | 87.70 | 5230 | Arun | Very high | High | Low | High | Very high | Low |
| 318 | 27.93 | 87.77 | 4914 | Arun | Very high | High | Low | High | High | High |
| 324 | 27.96 | 87.82 | 5247 | Arun | Very high | High | Low | High | Medium | Very high |
| 371 | 28.24 | 90.50 | 5606 | Kuri Chu | High | Very high | High | Very high | High | Very high |
| 372 | 28.24 | 90.51 | 5478 | Kuri Chu | Very high | Very high | High | Very high | High | High |
| 377 | 28.27 | 90.59 | 5414 | Kuri Chu | High | Very high | High | Very high | Very high | Very high |
| 382 | 28.30 | 90.61 | 5348 | Kuri Chu | High | High | High | High | Very high | High |
| 383 | 28.30 | 90.65 | 5466 | Kuri Chu | High | Very high | High | Very high | Very high | High |
| 388 | 28.21 | 90.66 | 5071 | Kuri Chu | Very high | High | High | Very high | Medium | Medium |
| 389 | 28.11 | 90.67 | 5161 | Kuri Chu | High | High | High | High | Low |  |
| 390 | 28.33 | 90.67 | 4648 | Kuri Chu | Very high | Very high | High | Very high | High | High |
| 392 | 28.27 | 90.72 | 4619 | Kuri Chu | Medium | High | High | High | High |  |
| 394 | 28.27 | 90.74 | 4510 | Kuri Chu | Medium | High | High | High | High |  |
| 395 | 28.10 | 90.74 | 5006 | Kuri Chu | Very high | High | High | Very high | Very high | High |
| 396 | 28.30 | 90.74 | 4778 | Kuri Chu | High | High | High | High | High | Very low |
| 398 | 28.08 | 90.74 | 5166 | Kuri Chu | Medium | High | High | High | High | Medium |
| 399 | 28.30 | 90.75 | 4731 | Kuri Chu | Very high | High | High | Very high | Medium |  |
| 400 | 28.28 | 90.75 | 4722 | Kuri Chu | Very high | High | High | Very high | Very high |  |
| 401 | 28.09 | 90.79 | 5165 | Kuri Chu | Very high | High | High | Very high | High | High |
| 419 | 28.00 | 90.91 | 4753 | Kuri Chu | High | Medium | High | High | Medium |  |
| 452 | 28.31 | 91.07 | 4729 | Kuri Chu | High | High | High | High | Very high | Low |
| 454 | 28.35 | 91.08 | 4790 | Kuri Chu | Very high | High | High | Very high | High | High |
| 485 | 28.04 | 91.29 | 4780 | Kuri Chu | High | Medium | High | High | High | Very low |
| 489 | 28.02 | 91.31 | 4973 | Kuri Chu | Medium | Medium | Very high | High | High |  |
| 490 | 27.99 | 91.32 | 4765 | Kuri Chu | Medium | Medium | Very high | High | Medium |  |
| 491 | 28.00 | 91.32 | 4801 | Kuri Chu | Medium | Medium | Very high | High | Medium |  |
| 493 | 28.09 | 91.33 | 5145 | Kuri Chu | High | Very high | High | Very high | Medium | Medium |
| 494 | 28.06 | 91.36 | 4620 | Kuri Chu | Very high | Very high | High | Very high | Medium |  |
| 497 | 28.08 | 91.42 | 5385 | Kuri Chu | Medium | Very high | High | High | Medium |  |
| 498 | 27.96 | 91.43 | 4857 | Kuri Chu | Medium | Medium | Very high | High | Medium |  |
| 512 | 28.00 | 91.51 | 5326 | Dangme Chu | Very high | Very high | High | Very high |  | Medium |
| 515 | 28.05 | 91.52 | 5087 | Dangme Chu | High | Very high | High | Very high | High | Low |
| 524 | 28.02 | 91.57 | 4664 | Dangme Chu | Very high | Very high | High | Very high | Medium | Medium |
| 532 | 28.02 | 91.60 | 4806 | Dangme Chu | Very high | Very high | High | Very high | Very high | Very high |
| 550 | 28.14 | 91.66 | 5139 | Dangme Chu | Very high | Very high | High | Very high | High | Low |
| 565 | 27.82 | 91.82 | 4746 | Dangme Chu | Medium | High | High | High | High |  |
| 571 | 28.09 | 91.85 | 5161 | Dangme Chu | High | Very high | High | Very high | High | Very low |
| 576 | 28.13 | 91.86 | 5404 | Dangme Chu | Medium | Very high | High | High | High |  |
| 587 | 28.14 | 91.89 | 5240 | Dangme Chu | High | Very high | High | Very high | Medium |  |
| 619 | 27.79 | 92.05 | 4948 | Dangme Chu | High | Very high | High | Very high | High | Medium |
| 655 | 27.77 | 92.31 | 4878 | Dangme Chu | High | High | High | High | High |  |
| 668 | 27.76 | 92.40 | 4970 | Dangme Chu | Medium | High | High | High | Low |  |
| 672 | 27.77 | 92.44 | 5176 | Dangme Chu | Medium | High | High | High | Medium | High |
| 727 | 28.32 | 93.05 | 4255 | Subansiri | Very high | Medium | Medium | High | Very high |  |
| 752 | 28.65 | 93.47 | 4122 | Subansiri | Very high | Medium | Medium | High | Medium |  |

1 Shrestha, F. *et al.* A comprehensive and version-controlled database of glacial lake outburst floods in High Mountain Asia. *Earth System Science Data* **15**, 3941-3961 (2023).

2 Zheng, G. *et al.* Increasing risk of glacial lake outburst floods from future Third Pole deglaciation. *Nature Climate Change* **11**, 411-417 (2021).

3 Zhang, T., Wang, W., An, B. & Wei, L. Enhanced glacial lake activity threatens numerous communities and infrastructure in the Third Pole. *Nature Communications* **14**, 8250 (2023).
